# Supplementary material for: Multimode Pedestrian Dead Reckoning Gait Detection Algorithm Based on Identification of Pedestrian Phone Carrying Position
Source: Hindawi journal article supplement (doi:10.1155/2019/4709501), 2019-10-31
Supplement: f1 [file 4709501.f1.zip]

Archive with 41 entries (35 files):
- MonteCarlo simulation results/
- MonteCarlo simulation results/Fig.15a/
- MonteCarlo simulation results/Fig.15a/Fig.15a.png
- MonteCarlo simulation results/Fig.15a/Original data of Fig. 15a .txt
- MonteCarlo simulation results/Fig.15a/Original data of uncontroled condition.txt.txt
- MonteCarlo simulation results/Fig.15b/
- MonteCarlo simulation results/Fig.15b/Fig. 15b.png
- MonteCarlo simulation results/Fig.15b/Original data of Fig. 15b.txt
- MonteCarlo simulation results/Fig.15b/Original data of uncontroled condition.txt.txt
- MonteCarlo simulation results/Fig.16a/
- MonteCarlo simulation results/Fig.16a/Fig.16a.png
- MonteCarlo simulation results/Fig.16a/Original data of Fig. 16a .txt
- MonteCarlo simulation results/Fig.16a/Original data of uncontroled condition.txt.txt
- MonteCarlo simulation results/Fig.16b/
- MonteCarlo simulation results/Fig.16b/Fig.16b.png
- MonteCarlo simulation results/Fig.16b/Original data of Fig. 16b.txt
- MonteCarlo simulation results/Fig.16b/Original data of uncontroled condition.txt.txt
- Figures/
- Figures/fig10.png
- Figures/fig11.png
- Figures/fig12.png
- Figures/fig13.png
- Figures/fig14.png
- Figures/fig15a.png
- Figures/fig15b.png
- Figures/fig16a.png
- Figures/fig16b.png
- Figures/fig1a.png
- Figures/fig1b.png
- Figures/fig1c.png
- Figures/fig2a.png
- Figures/fig2b.png
- Figures/fig3.png
- Figures/fig4.png
- Figures/fig5a.png
- Figures/fig5b.png
- Figures/fig6.png
- Figures/fig7a.png
- Figures/fig7b.png
- Figures/fig8.png
- Figures/fig9.png
