# Supplementary material for: Multimode Pedestrian Dead Reckoning Gait Detection Algorithm Based on Identification of Pedestrian Phone Carrying Position
Source: Hindawi journal article supplement (doi:10.1155/2019/4709501), 2019-10-31
Supplement: f1 [file 4709501.f1.zip › MonteCarlo simulation results/Fig.15a/Original data of Fig. 15a .txt]

  Downrange  Crossrange
  -2.6437523e+02  -1.1918782e+02
   1.0826335e+01  -3.4506597e+00
   1.3755534e+02   2.6048600e+01
   3.2705997e+00   1.0293657e+01
   8.9814629e+01  -5.7734221e+00
   6.5235589e+00  -3.0011101e+00
  -3.8293683e+01   4.6190841e+01
   6.6190048e-01   8.9982233e+00
  -6.1195428e+01  -7.9089314e+01
  -1.2128472e+01  -1.4032172e+00
  -2.1380876e+02   5.1824843e+01
   4.7163433e+00  -4.1890320e+00
  -3.8342631e+01  -8.1423846e+01
  -1.6702007e+01   1.3312159e+01
  -1.8760210e+02  -9.4368704e+01
   4.2271569e+00  -1.0321843e+01
  -3.9721659e+01   4.7106050e+00
  -2.7806416e+00  -1.3428692e+01
   3.9896103e+02   2.8811420e+01
  -5.9003456e+00   3.1650036e+00
  -2.0078101e+02   1.4895296e+02
  -1.6641645e+01  -1.2225934e+01
  -1.1704522e+02  -2.6465380e+01
   1.0000608e+01  -6.0858051e+00
  -1.8108861e+02   5.7505781e+01
   3.3756370e+00   7.0045209e-01
  -2.9095803e+01   7.3098725e+00
   2.2294457e+01   2.4580485e+00
  -1.6979906e+02   8.2630798e+00
  -2.2583540e+01   2.3580967e+00
  -4.2672864e+01  -6.7668506e+01
   2.0236909e+01  -5.0732306e+00
  -1.0675384e+02   1.0537370e+02
  -2.3645458e+00  -6.9214254e-01
  -2.9997582e+01  -3.8088113e-01
  -3.7280874e+00   2.2271681e+01
  -1.1866305e+02   1.7862819e+01
   4.2638756e+00   3.5479486e-01
  -1.7230843e+02   8.0061265e+01
   2.3234701e+00   6.6756911e-01
  -7.9999612e+01   2.4931234e-01
  -3.0813730e-01  -1.8356387e+01
  -6.7752456e+01  -4.2539449e+01
  -7.3416911e+00   9.0193147e+00
   1.8956122e+02  -1.2905131e+01
   4.1373613e-01  -2.3289545e+01
  -9.0353281e+01   7.8970150e+01
   9.8347775e-01  -1.2832561e+01
  -6.4768744e+01  -4.6957532e+01
   1.6039464e+01   1.2230626e+01
  -1.4264615e+02   4.6390479e+01
  -8.4539480e-01   1.7782559e+01
   1.9668039e+01  -2.2653217e+01
  -1.5650560e+01   7.5122898e+00
  -2.0618786e+01  -4.5550693e+01
   1.8245217e+00   3.8926620e+00
  -2.7807019e+02   8.2322364e+01
  -2.9005764e-01   5.4133444e+00
   1.7591631e+02  -3.8124167e+01
   3.5032100e+00  -2.1853356e+00
  -1.7309603e+02  -4.9373716e+01
   9.3372816e+00  -1.6846988e+00
  -2.4202609e+00  -1.9853018e+01
  -1.0667014e+01  -4.3360930e+00
  -2.2023914e+01   2.0370253e+01
   1.2424484e+01  -1.0933435e+01
  -1.3222355e+02  -1.0685005e+02
  -4.5701464e+00  -1.1406811e+01
  -1.8182866e+01   8.3296692e+00
  -3.0291773e+01  -1.8542991e+01
  -1.3961289e+02   1.0403953e+01
   1.2469041e-01  -1.1666650e+01
  -1.8774428e+02   2.9190516e+01
  -3.2057551e+00   2.7873352e+01
  -3.3001275e+02   1.1658296e+02
  -5.0781755e+00   1.0166244e+00
  -1.4920275e+02   1.5444686e+01
  -7.4110609e+00   4.3995219e+00
  -8.9291559e+01  -1.1270201e+01
  -9.4796092e+00   1.1294472e+00
  -3.0024822e+00  -1.6997348e+02
  -1.2506789e+01   2.9079013e+00
  -8.4861594e+01   2.9975155e+01
   3.9189421e+00   1.8370342e+00
   7.9952627e+01   2.7527259e+00
   4.4342191e+00   8.9847599e+00
   5.9258095e+01   9.4062831e+00
  -2.6116365e+00  -7.9892839e-01
  -2.2009090e+02  -1.7308955e+02
   2.7606825e+00   8.6708255e+00
  -1.8311453e+01  -2.3763221e+01
  -1.5594104e+00   9.1048258e+00
  -1.6758156e+01  -1.0916235e+01
  -4.4462782e+00  -1.7498793e+01
  -1.8984219e+02  -7.7423146e+00
  -1.5061597e+01  -7.3705977e+00
   1.6737767e+01   1.0947473e+01
  -2.2962645e+00  -6.0855744e+00
  -2.9794697e+01   3.5037181e+00
   1.2346791e+01   1.7298414e+01
  -1.4444672e+02  -4.0436923e+01
   1.6034573e+01   9.2307951e-01
  -3.9119707e+01   8.3455708e+00
  -1.0642134e+01   6.0110203e+00
  -1.5281522e+02   7.4481590e+01
  -2.4902474e+00   2.7483679e+00
  -9.6994913e+01  -2.4330779e+01
   1.5300725e+01  -6.1686593e+00
  -1.1708253e+02   5.6494968e+01
  -2.7407023e+00   4.3999790e+00
  -7.9761092e+01   6.1780440e+00
  -1.9223952e+00   2.2959689e+00
  -1.1902540e+02  -1.5262844e+01
  -1.1742123e+01  -2.3830150e+00
   5.3958482e+01  -5.9063374e+01
  -7.1200455e+00   3.2767816e+00
  -2.6492662e+02  -5.2094961e+01
  -4.8381505e+00  -1.9795863e+00
  -5.3518359e+02   2.9270894e+02
  -8.7572935e+00   1.0468328e+01
   8.4009937e+01  -3.2285145e+01
   1.6821036e+01   5.9535767e+00
  -1.7952852e+02  -1.3019684e+01
  -5.3201138e+00  -1.3182035e+00
  -2.2123177e+02  -6.2900757e+01
  -1.4605463e+00  -3.0750347e+00
  -5.9813928e+01   4.7216485e+00
  -1.6233767e+00   1.7694682e+00
  -6.4673750e+02  -2.1007287e+02
  -9.4148577e+00  -6.0391848e+00
  -1.0774732e+00  -1.9970955e+01
   2.6140632e+00  -6.5720130e+00
  -9.6497046e+01  -2.6235854e+01
   5.1524634e+00   7.5956833e+00
  -1.8028543e+01   2.3978566e+01
   1.3517494e+00  -9.8696188e+00
  -8.8043821e+01  -1.8662413e+01
   3.0706192e+00   4.1279601e+00
  -6.1284309e+01   3.3826521e+01
   9.4922183e+00   5.7124763e+00
   5.9006718e+01   1.0872317e+01
  -1.0297675e+01   1.2020528e+00
  -4.8811625e+01   6.3383162e+01
   1.8322726e+00   7.9888699e+00
  -1.7106390e+02  -5.6010182e+01
   6.2519036e+00   8.1548851e+00
  -1.5846005e+02  -6.1566337e+01
  -2.0971334e+00  -3.7307066e+00
  -1.2909887e+02  -5.4161635e+01
   4.6691444e+00   3.0048597e+00
  -7.3893242e+01  -5.1378875e+01
   1.5269767e+01   9.4213332e+00
   4.5525571e+01  -2.0674197e+01
   8.2606279e+00   4.0133634e+00
  -3.4494483e+02  -1.0301972e+02
   5.1290356e-01  -5.9325032e+00
  -4.4502535e+01  -2.2793077e+01
   2.3045624e-01  -7.2363113e+00
  -5.6269509e+02  -2.0826482e+02
  -3.0310762e+00  -1.5210266e+01
   2.6814288e+02   3.1613264e+01
  -2.1760635e+00   1.9918944e+00
  -4.1620829e+01   2.7707519e+01
  -1.9522120e+00  -1.0798663e+01
  -1.9996915e+02  -6.4127514e+01
  -6.7865554e-01   1.8088626e+01
  -8.3676125e+01  -7.1402424e+01
   6.6014314e+00  -6.4070951e+00
  -1.6279303e+02  -9.7971571e+01
   1.2606587e+01   9.7495022e+00
  -1.4901910e+02  -1.7126227e+01
  -1.1176387e+01  -9.9301901e+00
   5.9409679e+01  -8.3958317e+00
   1.0390907e+01   2.4951774e+00
  -1.8059233e+02   5.9045846e+01
   5.5278335e+00  -6.2637854e+00
  -9.7972271e+01  -2.0035819e+01
  -3.3488694e+00  -1.1187320e+01
  -2.5365694e+02  -5.7080285e+01
  -8.4870938e+00  -5.4886130e-01
  -1.0518113e+02  -5.7766166e+01
   4.5502956e+00   6.1251130e+00
  -1.9721444e+02   7.2155830e+01
  -1.3616945e+01  -9.8213153e+00
  -9.7889637e+01   2.0435730e+01
   8.6202161e+00  -2.0219589e+01
  -2.9943638e+02  -1.8380881e+01
  -4.7615302e+00  -6.2791226e-01
  -1.7426506e+02  -4.5074265e+01
   1.8368910e+00   5.8943337e+00
  -6.5452835e+01   2.4817863e+01
  -1.3028465e+00  -4.2505849e+00
  -2.0581326e+02   4.1724106e+01
   4.5167942e+00   1.6359997e+01
   1.9919520e+02   1.7924125e+01
   3.9135360e+00  -3.2566509e-01
   2.9751552e+01   3.8529424e+00
   3.3351083e+00   1.5162669e+01
  -3.9177440e+01  -8.0702050e+00
  -1.4490973e+01  -7.5189474e+00
  -1.9873114e+02  -2.2492960e+01
  -2.3298672e+01   3.9746700e+00
  -1.9334837e+02  -1.7382867e+02
  -1.3320044e+01  -1.0516323e+01
  -2.7574293e+01  -1.1817713e+01
   7.9141606e+00   5.4554010e+00
   1.6951595e+01  -1.2889004e+02
  -1.7653411e+00   8.1232300e+00
  -1.7766274e+02  -6.7349462e+01
  -8.6546803e+00  -3.2681423e+00
  -1.4706466e+02   2.9529426e+01
  -1.2571184e+01   1.4702013e+01
  -7.6918348e+01   2.1990173e+01
   3.0753516e+00   4.0184450e+00
   2.1994681e+02  -4.8372257e+00
   1.6554976e+01  -1.4410136e+01
   1.3975492e+02   8.2801721e+00
   2.5259997e+01  -1.3270431e+01
  -5.8211849e+01  -3.8876480e+01
  -1.1201283e+01  -2.1860216e+01
   5.4998865e+01  -4.3302712e+01
  -8.4792624e+00   5.9393080e+00
  -3.1174328e+02   7.2222755e+01
  -2.9375360e+00   6.0014251e+00
  -8.3766390e+01   7.1296507e+01
  -5.8902903e+00  -2.6025086e+00
  -1.9687732e+02   3.5203974e+01
  -2.2477106e+00   5.2654704e+00
  -9.0050794e+01  -4.3483958e+01
   1.3513858e+01  -7.2312148e+00
  -2.1990344e+02   6.5175847e+00
  -7.1453016e+00   1.8044938e+01
  -5.6611208e+01  -1.9878912e+01
  -1.3321748e+00   3.1202383e+00
  -1.5174724e+02   5.0722542e+01
   1.0186853e+01   1.8140155e+01
  -3.9919523e+01  -2.5360794e+00
  -7.9816358e+00   1.0931769e+00
   6.9764227e+01  -1.0969482e+02
  -3.4771086e-01   6.1133519e+00
  -7.6437218e+01  -6.4477529e+01
  -2.0027852e-01  -6.3783120e-01
   5.3348914e+00  -3.9642640e+01
   5.2006010e+00   4.5841106e-01
  -1.5973288e+02  -1.0288540e+02
   9.6422942e+00  -1.8073936e+00
  -3.9873363e+02  -3.1803953e+01
  -2.0026357e+01  -4.9300982e+00
  -1.6265337e+02  -4.9435635e+01
  -5.3355711e+00  -1.0965933e+01
  -2.5657604e+02  -4.2056362e+01
  -1.1564017e+01  -3.0864182e+00
  -2.1460929e+02   1.6383789e+02
  -9.7920631e+00  -5.4078642e+00
  -2.2968877e+02   1.1961188e+01
  -8.3136651e+00  -2.9258813e+00
  -7.0739046e+01   5.5641598e+01
  -2.8565097e+00   8.1855137e+00
  -1.2325547e+02   4.1329045e+01
  -1.7502124e+01   1.5548900e+00
   1.2053253e+01  -2.7472151e+01
  -2.6199543e+00  -1.4813991e+01
  -9.7453586e+01   2.2423172e+01
   2.2889793e-01  -6.5681593e+00
  -3.2214459e+02  -1.0873298e+02
  -2.9906603e+00   1.2694707e+00
  -2.8696919e+01  -5.2692379e+01
   3.5017941e+00   1.1741168e+01
  -3.0671583e+02  -4.5004436e+01
   1.1274923e+01   4.7542481e+00
   2.4112638e+01  -1.7848829e+01
  -1.3336779e+01   1.2615507e+01
  -6.0288259e+01  -7.9782992e+01
   3.3479882e-01  -2.8996304e+00
   1.9800723e+01  -2.8162672e+00
   2.8198406e+00   1.1287365e+01
  -1.6630097e+01  -4.7153365e+01
   5.0797465e+00   1.0965859e+00
   1.4805964e+02   2.4048742e+01
  -1.5770570e+01  -4.4699501e+00
   9.9893327e+01   4.6177051e+00
  -8.2358653e+00  -1.0202644e+01
  -2.1778862e+02  -3.1114593e+01
  -3.5385000e+00  -1.4831210e+01
   7.2055931e+01   5.3925345e+01
  -2.0518163e+01   4.9428706e+00
  -1.7824617e+02  -2.5065998e+01
   7.0154146e+00   2.6964864e+00
  -2.8664072e+01   8.8527377e+00
  -2.7787193e+00   6.9916033e+00
   1.3991908e+02  -4.7593712e+00
   1.0984246e+01  -1.1779829e+00
  -2.6859062e+01   1.3363787e+01
  -2.7246941e+00   6.0760058e+00
   4.9921520e+01  -2.8003241e+00
  -4.6861558e+00  -1.6988641e+01
  -2.3404280e+02  -8.7886109e+01
  -1.0581803e+01  -2.0989733e+00
  -1.2843086e+02  -5.5727137e+01
   1.3789720e+01  -9.0874559e+00
   1.8695363e+02  -3.3887149e+01
   8.2521889e+00  -1.0257336e+01
  -8.7198208e+01  -2.2281664e+01
   2.9080080e+01  -5.7000992e+00
  -1.5841880e+02  -1.0489749e+02
  -1.2078455e+01  -3.1142942e+00
  -1.1145312e+02   6.6919372e+01
  -1.9769823e+00  -5.5829428e+00
  -2.7262462e+01   1.2520310e+01
  -1.9609000e+01   3.1994913e+00
  -1.1049299e+01  -2.7891092e+01
   1.4366966e+01  -8.7587426e+00
  -5.1358362e+01   3.1021262e+01
   1.2404980e+00   7.8734578e+00
   1.7126572e+01   1.0328627e+01
   9.6095387e+00   9.4070440e+00
  -2.1850161e+02   2.1990236e+02
  -1.0721553e+01   1.8778655e+01
  -2.5400146e+02  -1.3994019e+02
   1.3545943e+01  -1.0359848e+01
   4.9429806e+01   7.5295583e+00
  -8.3958875e+00   4.2862268e+00
  -2.0356361e+02   1.2712929e+02
  -2.1383553e+01  -3.1577200e+00
  -1.6665379e+02  -6.8018475e+01
  -1.9412354e+00   9.5940051e+00
   2.9824777e+01   3.2376973e+00
   1.7118878e+01   2.4244611e+01
  -3.8755837e+01  -9.8987436e+00
   7.3936312e+00   1.0359759e+01
   1.0394285e+01  -1.7086803e+01
   4.8996532e+00  -1.8358591e+01
  -6.1524711e+01  -5.1134234e+01
  -6.0032656e+00   3.5006276e+00
  -5.5802479e+01  -1.0623598e+02
   3.0352079e+00  -2.8825636e+00
  -5.3727080e+01   5.9273947e+01
  -5.4452893e+00  -9.0465406e+00
  -4.6907467e+01  -8.8315851e+01
   1.0009283e+00   3.3621334e+00
  -7.8928600e+01   1.3048989e+01
  -8.8803208e+00  -9.4240588e-01
  -2.7743512e+01  -2.8814884e+01
   8.4037553e+00  -8.2229328e+00
  -2.5892979e+02  -1.7045634e+02
  -1.7946788e+01   1.9218224e+00
   7.8720152e+00  -2.8948772e+01
  -4.3896615e+00  -1.4693951e+01
  -3.7416243e+02   2.1190204e+02
  -1.9330229e+01  -8.6690282e-01
  -2.6988443e+02   7.8989770e+00
  -8.2494425e-01  -2.8414095e+00
   6.9319332e+01   9.7380802e+00
   1.8733102e+00  -1.0569727e+01
  -2.6361126e+02  -5.8387546e+01
  -6.6689067e+00  -2.3386004e+00
   2.9916794e+01   2.2328121e+00
   2.5854913e+01   3.0862314e+00
  -6.6317591e+01   2.2404846e+01
   7.2225403e+00   7.8466847e+00
  -3.8334903e+01   1.1420824e+01
   1.0487472e+00  -8.6081569e+00
  -1.9986795e+02  -7.2666275e+00
  -1.1479528e+01   1.4789585e+01
   2.9898285e+01  -2.4683056e+00
  -1.1658439e+01  -1.2488995e+00
   1.0484376e+02   3.3283407e+01
   2.1567009e+00  -4.6771458e+00
  -2.6278964e+02   6.1980679e+01
  -2.4371514e+00  -9.0472621e+00
   6.9114548e+01  -1.1098614e+01
   8.3508817e+00   1.1359700e+00
  -1.6011056e+02   5.7136756e+01
   6.9662442e+00   5.6316696e+00
  -4.0998786e+02   3.1545556e+00
  -8.0446596e+00   1.0335972e+00
  -2.0905837e+02  -1.9864503e+01
   1.5876991e+01  -6.0453009e+00
  -2.5256406e+01  -1.6189933e+01
   1.9781105e+00   1.8585929e+01
   4.9628639e+00  -7.9845914e+01
   2.9158437e+00  -1.8053734e+01
  -2.4897596e+02  -2.2604644e+01
   1.4193102e+01  -7.8414618e+00
  -3.8052946e+01  -1.2327744e+01
  -1.9605349e+00   3.2321314e+00
   3.2212483e+01  -2.3714045e+01
  -1.7737516e+00   8.8095279e+00
  -1.2344646e+02  -4.0755004e+01
   4.8819391e+00   8.5188593e-01
   1.4045965e+02  -5.2641114e+01
  -1.4223759e+01   6.6473412e+00
  -5.9018067e+01   1.0810539e+01
  -1.4022690e+01   3.2751212e+00
  -3.3274970e+01   3.7319919e+01
  -7.6484924e+00  -4.8093715e+00
  -3.4127006e+02  -7.7683610e+01
   8.8861043e+00   1.5763001e+01
  -2.0418368e+02   1.0587268e+02
  -1.9241851e+00  -2.7304695e+00
  -1.4736853e+02   6.2309853e+01
   7.4807678e+00   7.4773403e+00
  -3.9270325e+02  -1.7516894e+02
  -6.1560188e+00   1.6440407e+00
  -2.4484766e+02  -5.0493792e+01
   2.3504572e+01  -2.5505518e+00
  -2.9904572e+01  -2.3909296e+00
  -1.0615817e+01  -1.3981379e+01
  -4.2307990e+02  -2.0470320e+02
  -7.4230184e+00   4.4132693e+00
  -8.2521155e+01  -3.5920175e+01
  -1.4915903e+01  -2.4968865e+01
  -3.8848870e+02   1.5961369e+02
   8.5931133e-01   1.1384654e+01
  -9.8801976e+01   8.4487689e+01
   1.5442119e+01   2.1777787e+01
  -4.1493801e+01   2.7897391e+01
   1.1006102e+01  -5.6066500e+00
  -1.5688783e+02   3.1403939e+01
   5.5252702e+00  -2.0857618e-01
  -2.2394353e+02   1.1112738e+02
   3.2557464e-01  -1.4286469e+01
   8.8630535e+01   1.5640596e+01
  -1.0890643e+01  -2.5394468e+00
   1.3957375e+02   1.0916460e+01
   1.1173561e+01  -1.2038500e+01
  -3.7956417e+01  -1.2621824e+01
  -2.2558440e+00  -6.2909076e+00
  -1.8892869e+02  -2.0148177e+01
   3.7137881e+00   1.1453617e+01
  -1.7572595e+02   3.8992201e+01
  -7.6966591e+00  -2.1320946e+01
  -1.2062170e+02   7.1066204e+01
   1.5326303e+01  -1.7683027e+00
  -7.2423479e+01   8.2793959e+01
  -6.8493281e-02  -9.2996156e+00
  -1.1716305e+02  -5.6327786e+01
  -1.1135007e+01   3.9993094e+00
  -2.0022190e+02  -1.3232986e+02
  -1.2141170e+01   3.0181856e+00
  -6.9833702e+01  -4.8222489e+00
   7.7359091e-01  -2.9186338e+00
  -2.5498299e+02   5.0829857e+01
  -8.6365282e+00   1.3702487e+00
  -1.1519064e+01  -6.9045718e+01
   1.1092733e+01  -4.7106991e+00
  -9.9894519e+01  -6.6491241e+01
   1.0932657e+01  -1.0149436e+01
   1.7793680e+02   2.7175270e+01
   6.2770729e+00   8.2572715e+00
  -2.3398395e+02  -5.3399527e+01
  -1.6487902e+00   6.4867926e+00
   1.9285769e+01   5.2970860e+00
  -3.0051296e-01  -3.8258480e+00
  -1.9550433e+01   4.2167017e+00
  -8.6487992e+00  -1.2705944e+01
   5.3766714e+00   1.0060771e+01
   3.1285860e+00  -5.0458641e+00
   1.8338850e+01  -6.5090774e+00
   3.1920674e+00  -2.1236555e+01
  -2.2588469e+01   2.5705616e+00
  -2.4144704e+00   1.0077734e+01
   8.6217332e+00  -9.4437781e+00
  -1.0224245e+00  -1.4720146e+00
   3.1876524e+00  -1.3217885e+01
  -1.7115164e+01  -1.3193787e+00
  -1.3076883e+01   9.2482593e+00
   1.3702985e+01   8.9788843e+00
  -4.3359202e+00   4.9849075e-04
  -7.5492832e+00   5.3615708e+00
   3.4262447e+00  -5.4918915e-01
   3.2519054e+00   8.2607000e+00
   3.5783969e+01   9.1112727e+00
   1.4383803e+01   1.0063335e+00
   2.7694370e+01   5.9458370e+00
  -2.9442842e+01   4.4937762e+00
  -1.3498869e+01   3.5020117e+00
  -8.0949869e+00  -6.9115913e+00
   3.0349235e+01   1.2502512e+01
  -1.0688705e+01   8.5773255e+00
   7.2540422e+00   9.2978946e+00
  -1.1470701e+01   6.7697781e+00
  -6.3054873e-01   2.3976326e+00
   8.8839563e+00   4.1149062e+00
   7.1474290e+00  -6.9036110e+00
  -7.8728280e+00  -9.4848098e+00
  -2.0496606e+00  -6.5155364e+00
   2.9387147e+00   7.9933710e-01
  -1.2414435e+00   1.1921019e+01
  -3.0344092e+00  -2.3192803e+01
   1.4896976e+01  -1.6118304e+01
   7.2688513e+00  -2.1924349e+01
   1.4090345e+01  -2.4461937e-01
   1.0346930e+01   5.8117232e+00
   1.4171924e+01  -1.9488472e+01
   4.8889377e+00  -2.4862839e+01
   6.7149713e+00   1.0204980e+01
   1.6302353e+01  -7.0837213e-01
  -1.2074869e+01   8.6171630e+00
   7.1723865e+00   1.1620835e-02
