# Supplementary material for: Multimode Pedestrian Dead Reckoning Gait Detection Algorithm Based on Identification of Pedestrian Phone Carrying Position
Source: Hindawi journal article supplement (doi:10.1155/2019/4709501), 2019-10-31
Supplement: f1 [file 4709501.f1.zip › MonteCarlo simulation results/Fig.15a/Original data of uncontroled condition.txt.txt]

  Downrange  Crossrange
   2.0636311e+02  -2.5327452e+01
  -3.5592051e+02  -1.6045902e+02
   3.9656916e+02   7.5097570e+01
  -4.7923917e+01  -1.3884131e+01
   3.2708440e+02  -2.1025487e+01
   5.1990582e+01  -4.2782480e+01
  -8.8264940e+01   3.7160990e+01
  -1.6268531e+02   1.9623528e+02
  -5.9363029e+01   3.1901593e+01
  -1.2414547e+02  -1.6044630e+02
  -3.3676272e+02   8.1627502e+01
  -8.4243119e+01  -1.7889745e+02
  -3.7066614e+01  -4.7687705e+01
   3.2410412e+01  -2.4770430e+01
   1.2744160e+02  -9.3885666e+01
   1.0295196e+01   6.5918631e+00
  -4.2675284e+01  -6.4951479e+01
  -2.8278924e+02  -1.4225030e+02
  -1.5446500e+02   1.8318057e+01
   6.5257712e+02   4.7126591e+01
  -7.7244224e+01   4.8740568e+00
   1.6250731e+02   8.2370032e+01
  -3.2679436e+02   2.4243820e+02
  -1.1833389e+02  -2.5987046e+01
  -2.2092730e+02  -4.9954411e+01
  -6.0154745e+01  -1.5766170e+01
   1.0439100e+02   1.6610855e+02
  -3.0151921e+02   9.5749244e+01
  -1.4960824e+02   3.7586767e+01
  -2.8364410e+02   1.3803220e+01
  -1.0012488e+02  -1.5877305e+02
  -2.3450131e+02   2.3146961e+02
  -1.4022298e+02  -1.7804197e+00
  -9.2258560e+01  -3.6116014e+01
  -2.4297379e+02   3.6575806e+01
  -3.0132034e+02   1.4000527e+02
   1.4461226e+02  -1.2428450e+02
  -1.9599502e+02   6.1080268e-01
  -4.1235476e+01   1.4251271e+02
  -1.5727654e+02  -9.8748560e+01
   4.2657158e+02  -2.9040550e+01
  -9.7573393e+01  -1.9128673e+01
  -2.1540975e+02   1.8827141e+02
   8.3694826e+01   7.3913840e+00
   1.8796454e+01  -9.1435405e+01
   6.0335048e+01   1.4980246e+02
  -1.5075109e+02  -1.0929499e+02
   1.8173526e+02  -4.7105562e+00
   1.6786172e+02   5.9486789e+01
  -2.6532885e+02   8.6288574e+01
   8.6474665e+01   5.1300958e+01
   9.6945982e+01  -5.2193254e+01
   1.3498827e+02  -1.5547655e+02
  -6.7269488e+01  -1.4861068e+02
   4.9029637e+01  -5.9601575e+01
  -3.9886976e+02   1.1808494e+02
   1.5291759e+02  -5.3998068e+01
   1.4139251e+01   4.2208713e+01
   4.0006993e+02  -8.6702212e+01
   1.0133788e+02  -1.6443160e+01
  -2.7017610e+02  -7.7064725e+01
  -1.1056618e+02  -1.1378433e+01
   4.8138553e+01  -1.2415335e+02
   1.0144368e+02   8.4411562e+01
   2.3362659e+01  -2.6472527e+01
  -1.6473223e+01  -1.3512725e+02
   1.1692831e+02  -3.1019480e+01
   6.5640457e+01   1.0834765e+02
  -1.9235208e+01  -1.0689846e+02
  -3.1275583e+01   1.6735597e+02
   7.8045243e+01   7.0177858e+01
  -8.8865057e+00  -1.1785503e+02
  -1.5020582e+02   1.3892765e+02
  -2.0963085e+02  -1.6940300e+02
  -1.4195314e+02   6.5029501e+01
  -2.6086073e+02   1.9439343e+01
  -3.0318052e+02   4.7138565e+01
  -4.5899964e+02   1.6214991e+02
   3.1176317e+01  -1.0703035e+02
  -2.6996843e+02   2.7945715e+01
  -2.0245054e+02  -2.5552901e+01
   1.3195663e+02  -7.8499878e+01
  -5.2761393e+00  -2.9868746e+02
   4.2728610e+01   8.2694447e+01
   2.1479745e+02   4.7553795e+01
  -2.1398381e+02   7.5584226e+01
   5.0499455e+01   9.8236509e+01
   3.3584896e+02   1.1563099e+01
  -7.0991394e+00   2.8680619e+01
  -3.7793385e+01   5.0861083e+01
   3.2112955e+02   5.0974225e+01
  -6.8569062e+01   1.1267443e+02
  -2.9624428e+02  -2.3298005e+02
   2.0792337e+02  -2.7673808e+01
  -8.3395669e+01  -1.0822460e+02
  -1.0269103e+02  -6.6892769e+01
  -8.7395612e+01  -4.1720711e+01
  -3.0482937e+02  -1.2431825e+01
   1.7578466e+01  -1.2335220e+02
  -1.9480746e+01   9.2010059e+01
   2.7214896e+02   1.7800125e+02
   1.6281914e+02  -1.1251371e+02
  -1.4993851e+02   1.7632074e+01
  -2.4324144e+02  -6.8093864e+01
  -1.6500967e+02   3.5202205e+01
   2.9784011e+01   7.4636858e+00
  -4.6135989e+01   4.0961659e+00
  -2.8406695e+02   1.3845321e+02
  -1.9813472e+02  -4.9701288e+01
  -2.4381705e+02   1.1764724e+02
  -1.9682219e+02   1.5245230e+01
   7.7134003e+01   4.2204523e+01
  -3.3916524e+01   1.9907792e+01
  -4.5847219e+01   3.7414307e+01
   1.5534052e+02  -4.3152166e+01
  -9.2323495e+01   4.3100173e+01
  -2.2474271e+02  -2.8819169e+01
   2.6097272e+02  -5.6163720e+00
   1.7160960e+02  -1.8784520e+02
  -4.2118547e+01  -7.1104999e+01
   1.6703356e+02   4.4202565e+00
   1.4392837e+02   1.5331224e+02
   3.0060121e+00  -2.3747263e+01
   1.2961828e+02  -4.3597867e+01
  -3.7119306e+02  -7.2991109e+01
  -6.6573014e+02   3.6410901e+02
   2.8886412e+02  -1.1101091e+02
  -2.9492571e+02  -2.1388466e+01
  -3.1890032e+02  -9.0669941e+01
  -1.8072601e+02   1.4266321e+01
  -9.6120761e+00   1.1672574e+01
  -7.5081921e+02  -2.4388063e+02
  -7.5907818e+00  -1.4069507e+02
  -2.0009769e+02  -5.4403050e+01
  -1.3805590e+02   1.8361896e+02
  -1.9108592e+02  -4.0503970e+01
  -1.8677436e+02   1.0309208e+02
  -1.1520250e+02   5.3858103e+01
   4.2733593e+01   1.0249246e+02
  -5.4995698e+01   4.0385144e+01
   1.6530816e+02   5.4258744e+01
  -1.1860283e+02   1.0075182e+02
   3.2076541e+02   5.9102818e+01
  -1.6637457e+02   2.1604169e+02
   5.7768849e+01  -2.8658768e+01
   7.7967719e+01   2.3313807e+01
   6.0364528e+01  -6.7141810e+01
   1.0331201e+01   1.9457979e+02
   1.3217766e+02   5.0971690e+01
  -2.7009135e+02  -8.8434001e+01
   1.8768831e+00   6.6532346e+00
  -2.5721686e+02  -9.9936233e+01
   6.0607824e+01  -3.2962419e+01
   2.5722291e+00  -1.0562177e+01
   1.1290856e+01  -6.9214249e+01
  -2.2110735e+02  -9.2762517e+01
  -1.5880246e+02  -1.1041729e+02
  -8.3673422e+01   9.5935266e+01
   2.3359459e+01   2.2723329e+01
   2.4025440e+02  -1.0910499e+02
   5.6695344e+01   6.6688509e+01
  -3.3714584e+01   6.0308706e+01
  -4.4529656e+02  -1.3299033e+02
   1.5294265e+02  -1.7644628e+01
  -1.3742761e+02  -7.0386957e+01
  -6.5826669e+02  -2.4363779e+02
   5.2104165e+02   6.1429292e+01
   4.1496461e+01   1.5271551e+02
  -1.6952223e+02   1.1285312e+02
   1.5773150e+02   1.4775748e+02
  -3.0019707e+02  -9.6269306e+01
  -1.5848717e+02  -1.3524011e+02
   8.6411804e+00  -1.1261789e+02
   2.4769530e+01   1.2415863e+02
   2.0173870e+02  -6.1621259e+01
   5.7303551e+01   1.4734996e+00
  -2.4814774e+02  -1.4933946e+02
  -2.5134140e+01   7.0972498e+01
  -1.0981164e+02  -1.5877651e+00
   3.9161268e+01  -1.1979864e+02
  -3.6719300e+01   2.6890762e+01
  -2.5583510e+02  -2.9402203e+01
   8.3541384e+01   2.5752556e+01
   1.6588832e+02  -6.2478988e+01
  -7.9540462e+01   9.7236658e+01
   9.0519398e+00  -1.2146508e+02
   6.8830519e+01   5.0806853e+01
   2.8919283e+02  -4.0869003e+01
  -8.0204585e+01   1.2885801e+02
  -6.0524038e+01  -9.2188911e+01
   1.4594796e+02   1.4763343e+02
   7.9123102e+00  -1.3595385e+02
  -3.0845101e+02   1.0085008e+02
  -9.9240476e+01   1.5252974e+01
  -2.0682356e+02  -4.2296452e+01
  -3.5735348e+02  -8.0415063e+01
  -1.9475603e+02  -1.0696129e+02
  -3.2075947e+02   1.1735787e+02
   1.0520175e+02   7.5181096e+01
  -2.1565216e+02   4.5020182e+01
  -4.1533824e+02  -2.5495508e+01
  -2.7260681e+02  -7.0510701e+01
  -1.9934302e+01   3.4583155e+01
  -1.9583525e+02   7.4255187e+01
   1.4715181e+02   6.0506248e+01
  -3.3015878e+02   6.6932422e+01
   4.5472326e+02   4.0917235e+01
   6.4613808e+01  -8.6435551e+01
   9.4878859e+01   1.5057890e+02
   4.7226033e+01  -3.4296783e+00
   2.7880953e+01  -1.4941772e+01
  -1.8984657e+01  -2.4133435e+01
   2.8899951e+02   3.7426567e+01
  -1.4019609e+02  -2.8879150e+01
  -3.0428996e+02  -3.4440410e+01
  -2.6873118e+02  -2.4160112e+02
   1.2402702e+01  -5.5239101e+01
   1.5222916e+02   2.2232114e+00
  -6.6275199e+01   5.4852629e+00
  -3.3642105e+01  -5.9014746e+01
  -1.1947900e+02  -5.1205974e+01
   2.9446076e+00   1.3270476e+02
   3.4189122e+01  -2.5995415e+02
  -2.7067795e+02  -1.0261023e+02
   1.0960530e+01  -7.1281693e+01
  -1.3545314e+02   1.3219935e+02
  -2.6627362e+02   5.3465649e+01
  -8.2251821e+01   7.9708645e+00
   7.6205199e+01  -7.5905221e+01
   1.3346387e+02   2.6826203e+01
  -4.2386715e+01   1.0563272e+02
  -2.0207866e+02   5.7772232e+01
   2.5762680e+02   3.8522621e+01
   2.3873548e+02  -3.8891878e+01
   2.3970992e+02   1.2440821e+01
   4.6721893e+02  -1.0275409e+01
  -7.8393018e+01   1.9597381e+02
   3.9645117e+02   2.3488860e+01
  -1.4456670e+02  -9.6548120e+01
   7.1314404e+01  -1.1702632e+02
  -1.3614716e+01   3.4669910e+01
   2.0284944e+02  -1.5971113e+02
  -4.3832433e+02   1.0154827e+02
  -2.0936700e+02   1.7819959e+02
  -3.1725088e+02   5.6728176e+01
   1.8091198e+02  -8.5521493e+01
   3.3942743e+01   7.0673403e+01
  -1.8459630e+02  -8.9138336e+01
   1.0562266e+02  -5.0806730e+01
  -3.3770630e+02   1.0009072e+01
  -1.5205798e+02  -5.3394853e+01
   2.5719994e+02   8.0271117e+01
  -2.7962333e+02   9.3465993e+01
  -1.7380400e+01   1.9738848e+01
   9.5474350e+01   7.9443494e+01
  -1.4630562e+02  -9.2947671e+00
   1.5855047e+02  -2.4929918e+02
  -1.5166697e+02  -1.2793652e+02
   8.5035561e+00  -5.3538185e+01
  -1.1662435e+02   7.1574672e+01
  -3.2309396e+01   2.5123098e+01
   2.3783463e+01  -1.7673073e+02
   2.2116727e+02  -1.4541699e+01
  -2.4778887e+02  -1.5960307e+02
  -5.0857191e+02  -4.0564919e+01
  -4.8724064e+01   3.9863634e+01
  -2.6586328e+02  -8.0804476e+01
  -3.6579416e+02  -5.9958723e+01
  -1.7105808e+00  -7.6855122e+01
  -3.4550273e+02   2.6376509e+02
   4.9774967e+01  -1.6035595e+01
  -7.3601248e+01   9.3456681e+01
  -3.4742163e+02   1.8092201e+01
  -1.9708102e+02   1.5501909e+02
   1.0126243e+02   8.9994566e+01
   8.0821069e+01  -2.0134366e+01
  -9.0709504e+01   5.1217198e-01
  -2.4565759e+02   8.2371954e+01
   2.8563286e+01   6.4489035e+01
   7.2249837e+01  -1.6467409e+02
   1.0075558e+01  -1.3934222e+02
  -2.1618685e+02   4.9742601e+01
  -1.0504662e+02  -5.2181448e+01
  -4.2552072e+02  -1.4362537e+02
   2.5340337e+01   3.8988182e+01
  -8.0553740e+01  -1.4791024e+02
  -4.1542720e+02  -6.0955663e+01
   1.8265190e+02  -1.3520389e+02
  -1.2567761e+02  -1.6631656e+02
   2.5052148e+02  -3.5631801e+01
  -5.3815020e+01  -1.5258836e+02
   4.0316798e+02   6.5484980e+01
  -4.2095270e+01  -7.1498196e+00
   3.4946269e+02   1.6154389e+01
  -2.8272843e+01  -4.4180994e+01
   1.5066720e+02  -3.3971106e+01
   1.9100808e+02  -3.1483647e+01
  -3.2632647e+02  -4.6620964e+01
   3.1960428e+02   2.3918601e+02
   3.5083964e+01   4.8212053e+01
  -2.1962572e+01   1.2198486e+02
  -7.5797976e+01   3.1743507e+01
   1.6160116e+02  -1.6207020e+01
   4.3035171e+00  -4.0453693e+01
  -2.9084557e+02  -4.0900372e+01
   1.1900897e+02   1.2314277e+01
  -1.1397919e+02   8.1430864e+00
  -2.4495838e+01  -7.5291468e+01
  -1.4861828e+02   4.5899920e+01
  -8.0350597e+01  -8.2719288e+01
   3.8085654e+02  -1.2954900e+01
  -1.5728780e+02   7.8258902e+01
   8.6687673e+01   3.0691335e+01
   2.9213032e+02  -1.6386912e+01
  -3.2909305e+02  -1.2357871e+02
  -2.2337012e+02  -9.6922008e+01
   4.1712044e+02  -7.5607102e+01
  -1.8853483e+02  -4.8176102e+01
   1.7601618e+02   7.8974114e+01
   2.1210627e+02   1.0052091e+02
  -2.4436712e+02  -1.6180843e+02
  -2.3688362e+02   1.4223113e+02
  -1.5202076e+02   6.9815668e+01
  -5.3135093e+01  -1.3412578e+02
   6.2911764e+01   3.9374996e+01
  -1.8406713e+02   1.1117946e+02
   2.6913381e+02   1.6230819e+02
   2.2263955e+02   2.4967358e-01
  -7.8335152e+01   7.6446737e+01
   2.8255474e+01   1.5086444e+02
  -3.4838041e+02   3.5061379e+02
   2.1677047e+02  -1.4867319e+01
   5.3783862e+01   1.1053826e+02
  -3.3893747e+02  -1.8673504e+02
   1.2174277e+02   7.4993598e+01
   3.1056394e+02   4.7307676e+01
   1.0073798e+02  -2.2052599e+01
  -5.9500298e+01   6.8500263e+01
   4.2091903e+01  -5.3386038e+01
  -3.3155971e+02   2.0706524e+02
  -1.2004088e+02   1.3100141e+01
  -1.5357269e+01  -5.3559665e+01
  -2.6411018e+02  -1.0779456e+02
   3.4772570e+00  -3.7321094e+01
   2.8927640e+02   3.1403064e+01
  -7.6482917e+01  -8.7744695e+01
   1.0440215e+02  -5.3190834e+01
  -8.3597473e+01  -1.9004670e+01
  -6.9038872e+01  -5.0289793e+01
   4.2854077e+01  -8.5013906e+01
   1.4453448e+02   5.7796321e+01
   4.3477793e+01  -8.5732471e+01
  -8.3404239e+01  -4.4996146e+01
   1.3194089e+01  -1.4851725e+01
  -1.3777036e+02  -3.5188337e+01
   1.2595562e+02  -3.5247635e+01
   9.5502524e+01  -1.5699327e+02
  -1.3588638e+02  -1.1293748e+02
   1.8809017e+02  -1.4178002e+01
  -1.0691198e+02  -2.0353753e+02
  -1.7783020e+02   1.9618967e+02
   1.3309774e+02   3.3254680e+01
   1.1931180e+02  -8.2983338e+00
  -9.9101538e+01  -1.8658515e+02
   1.6564800e+02  -8.8756924e+01
  -9.6347744e+01   1.3899154e+02
   3.3706513e+01  -3.2200499e+01
   5.7871187e+01   1.2129209e+02
  -2.0244422e+02   3.3469393e+01
   3.5617487e+01   2.4648368e+01
  -9.8967621e+01  -1.0278946e+02
  -3.4771930e+02  -2.2890745e+02
   3.5188132e+01   3.5842292e+01
   4.4770118e+01  -1.6463890e+02
  -5.0392323e+02   2.8539039e+02
  -3.8308045e+02   1.1211998e+01
   3.2941098e+02   4.6276132e+01
  -3.6760994e+02  -8.1422329e+01
   1.8467768e+02   1.2203015e+02
   2.8671301e+02   2.1398559e+01
  -1.8781590e+02   6.3452037e+01
  -4.7770853e+01  -2.9461502e+00
  -6.3807214e+01  -5.5498999e+01
  -6.7024872e+00   3.0432489e+01
  -1.1882581e+02   9.9544714e+01
  -1.6051841e+02   4.7822018e+01
   9.6162580e+01   1.1793705e+02
  -3.1514580e+02  -1.1457801e+01
   1.7869934e+02  -2.6541635e+01
   8.4314045e+01  -4.4111097e+01
   2.5701796e+01   4.7180331e+01
   1.5153906e+02   1.0811595e+02
   2.0970931e+02   2.7496503e+01
   1.9269981e+02   2.0781728e+01
   2.6804716e+02  -2.2129106e+01
   6.3779545e+00   4.0550938e+01
   1.4562074e+02   1.1872208e+01
   6.8104273e+01  -6.1838959e+01
   2.8438773e+01  -1.2229923e+02
   1.8853145e+02   1.2151747e+02
   3.6973525e+02   1.1737511e+02
  -3.8316240e+02   9.0371393e+01
   3.0359317e+02  -4.8751869e+01
  -2.8274573e+02   1.0090011e+02
  -5.2670452e+02   4.0526046e+00
   5.1543633e+01   6.0249795e+01
   2.2978604e+02  -1.5236238e+01
  -3.1617153e+02  -3.0042282e+01
  -1.1069017e+02  -7.0954930e+01
   1.3237534e+02   1.2433157e+02
   2.0963176e+01   1.9515330e+02
   1.2776240e+01  -2.0555280e+02
  -3.6236169e+02  -3.2898988e+01
  -1.3520660e+02  -4.3801924e+01
   1.8668744e+02  -1.3743475e+02
  -2.2599480e+02  -7.4610633e+01
   3.4407239e+02  -1.2895058e+02
   1.3626548e+02   4.2772557e+01
  -6.1548068e+01  -5.4032183e+00
  -1.8102456e+02   3.3158880e+01
  -1.6013719e+02   1.7960368e+02
  -4.4190379e+02  -1.0059095e+02
   4.4984087e+01  -4.1208840e+01
  -1.0913776e+02   1.1223355e+02
  -3.3435966e+02   1.7337112e+02
   2.1595867e+02   8.4193780e+00
   2.1249135e+01  -8.0217302e+01
  -2.7342876e+02   1.1561021e+02
   6.4659801e+01   6.3645235e+00
  -4.8626708e+01   3.9349765e+01
   1.6098808e+01  -1.4652342e+01
  -1.1351982e+02   4.4367497e+01
   3.7262433e+01  -8.9284483e-01
  -4.8755878e+02  -2.1748013e+02
   1.9438480e+02  -5.8614928e+01
   5.9274984e+01  -6.4408810e+01
   3.2841512e+01   1.0889528e+02
  -1.3199378e+02   5.4863842e+01
   1.2953009e+02   5.0865523e+00
   1.1408626e+02   6.8248746e+01
   1.3666851e+02  -1.3310167e+02
  -6.4875876e+01  -2.6467626e+01
   2.4846365e+01   3.4755957e+01
  -1.3732696e+02   9.5393548e+01
  -3.4662247e+02  -7.1482336e+01
  -1.4364294e+02  -1.1484537e+01
  -8.3436590e+01   3.2417036e+01
  -6.7317540e+01   1.0230167e+02
  -1.1427426e+02   6.4787959e+01
   2.4579927e+01   1.0925812e+02
  -9.4569940e+01   7.1211498e+01
  -5.1854094e+02  -2.5089112e+02
  -1.7627724e+02  -7.6730743e+01
  -5.1264203e+02   2.1062307e+02
   1.3209879e+02   4.3419600e+00
   7.4547933e+01   1.6702797e+02
  -2.2786766e+02   1.9485453e+02
  -1.6750962e+02   1.1262119e+02
  -2.8168377e+02   5.6384105e+01
  -3.5523574e+02   1.7627845e+02
   3.5165052e+02   6.2055630e+01
   3.9513379e+02   3.0904537e+01
  -1.4165284e+02  -4.7104478e+01
  -2.9629319e+02  -3.1597994e+01
   1.0329231e+02  -4.0153723e+01
  -3.0103912e+02   6.6798206e+01
  -2.4963853e+02   1.4707853e+02
   2.2157749e+02  -4.9737258e+01
  -1.9941696e+02   2.2797192e+02
   1.7166264e+02  -1.0261499e+02
   1.0052961e+02  -6.4012375e+01
   1.4515350e+02  -2.3568466e+00
  -2.4973325e+01   1.2462142e+02
  -2.1323736e+02  -1.0251686e+02
  -2.8823482e+02  -1.9049901e+02
  -8.1351594e+01  -4.1984663e+01
   2.4909016e+02   8.8523103e+01
  -1.7995959e+02  -1.2426807e+01
  -9.9622665e+01  -2.2602318e+01
  -6.9368837e+01  -1.7878462e+01
  -1.3240496e+02   7.2179011e+01
   2.4249043e+02   2.7894812e+01
  -3.7264573e+02   7.4285462e+01
  -3.0239849e+01  -1.8125883e+02
  -1.0868129e+02  -3.8335074e+01
  -1.8633271e+02  -1.2402576e+02
   4.3811685e+02   6.6911080e+01
  -5.7279540e+01   4.2259505e+00
  -3.3469209e+02  -7.6383013e+01
   1.4245587e+02   5.7250327e+01
   8.1718761e+00   5.8660091e+01
  -2.6224380e+00   3.0283102e+01
   8.7557227e+01   4.8559630e+01
   2.8362291e+02   7.7900704e+01
   1.5133319e+01  -1.0873042e+01
  -1.1167684e+02   9.5042297e+01
  -1.1195654e+02   2.2983018e+01
   6.1750725e+01   1.3367413e+02
  -1.4071078e+02   3.0348965e+01
  -2.3086685e+01  -1.2195373e+02
