# Supplementary figures and images for: Multimode Pedestrian Dead Reckoning Gait Detection Algorithm Based on Identification of Pedestrian Phone Carrying Position
Source: Hindawi journal article supplement (doi:10.1155/2019/4709501), 2019-10-31

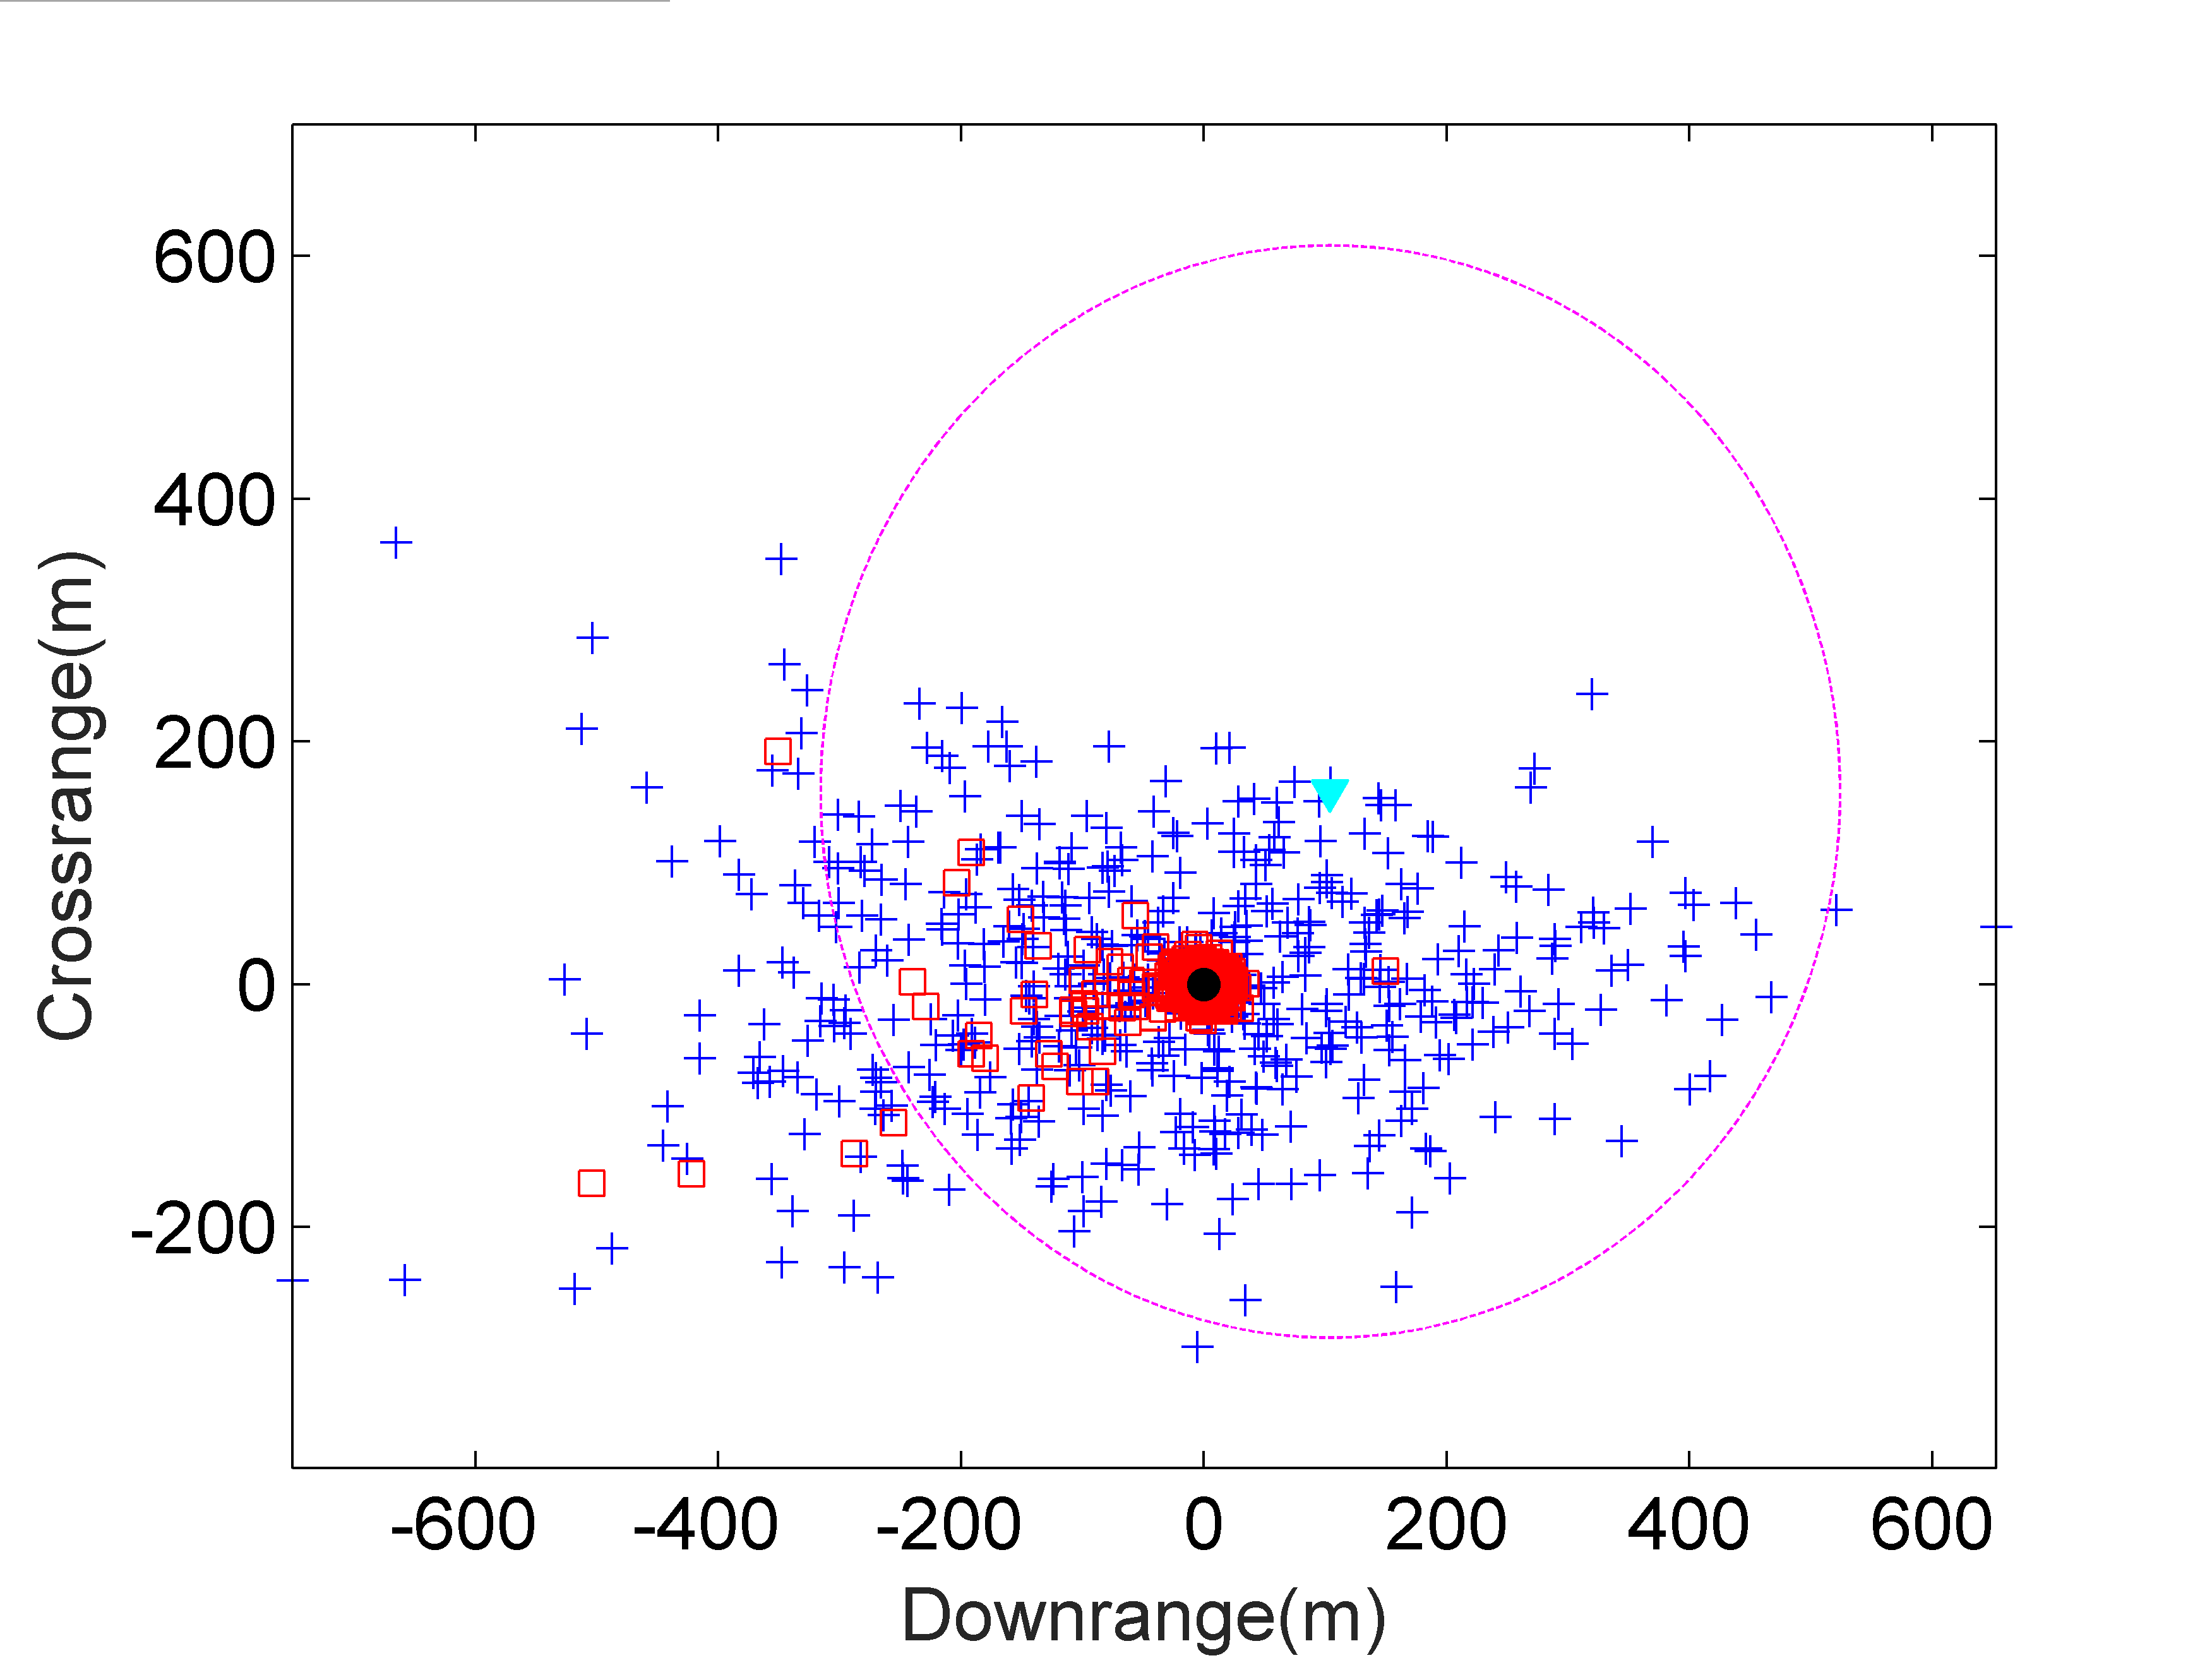

Supplement: f1 [file 4709501.f1.zip › MonteCarlo simulation results/Fig.15a/Fig.15a.png]

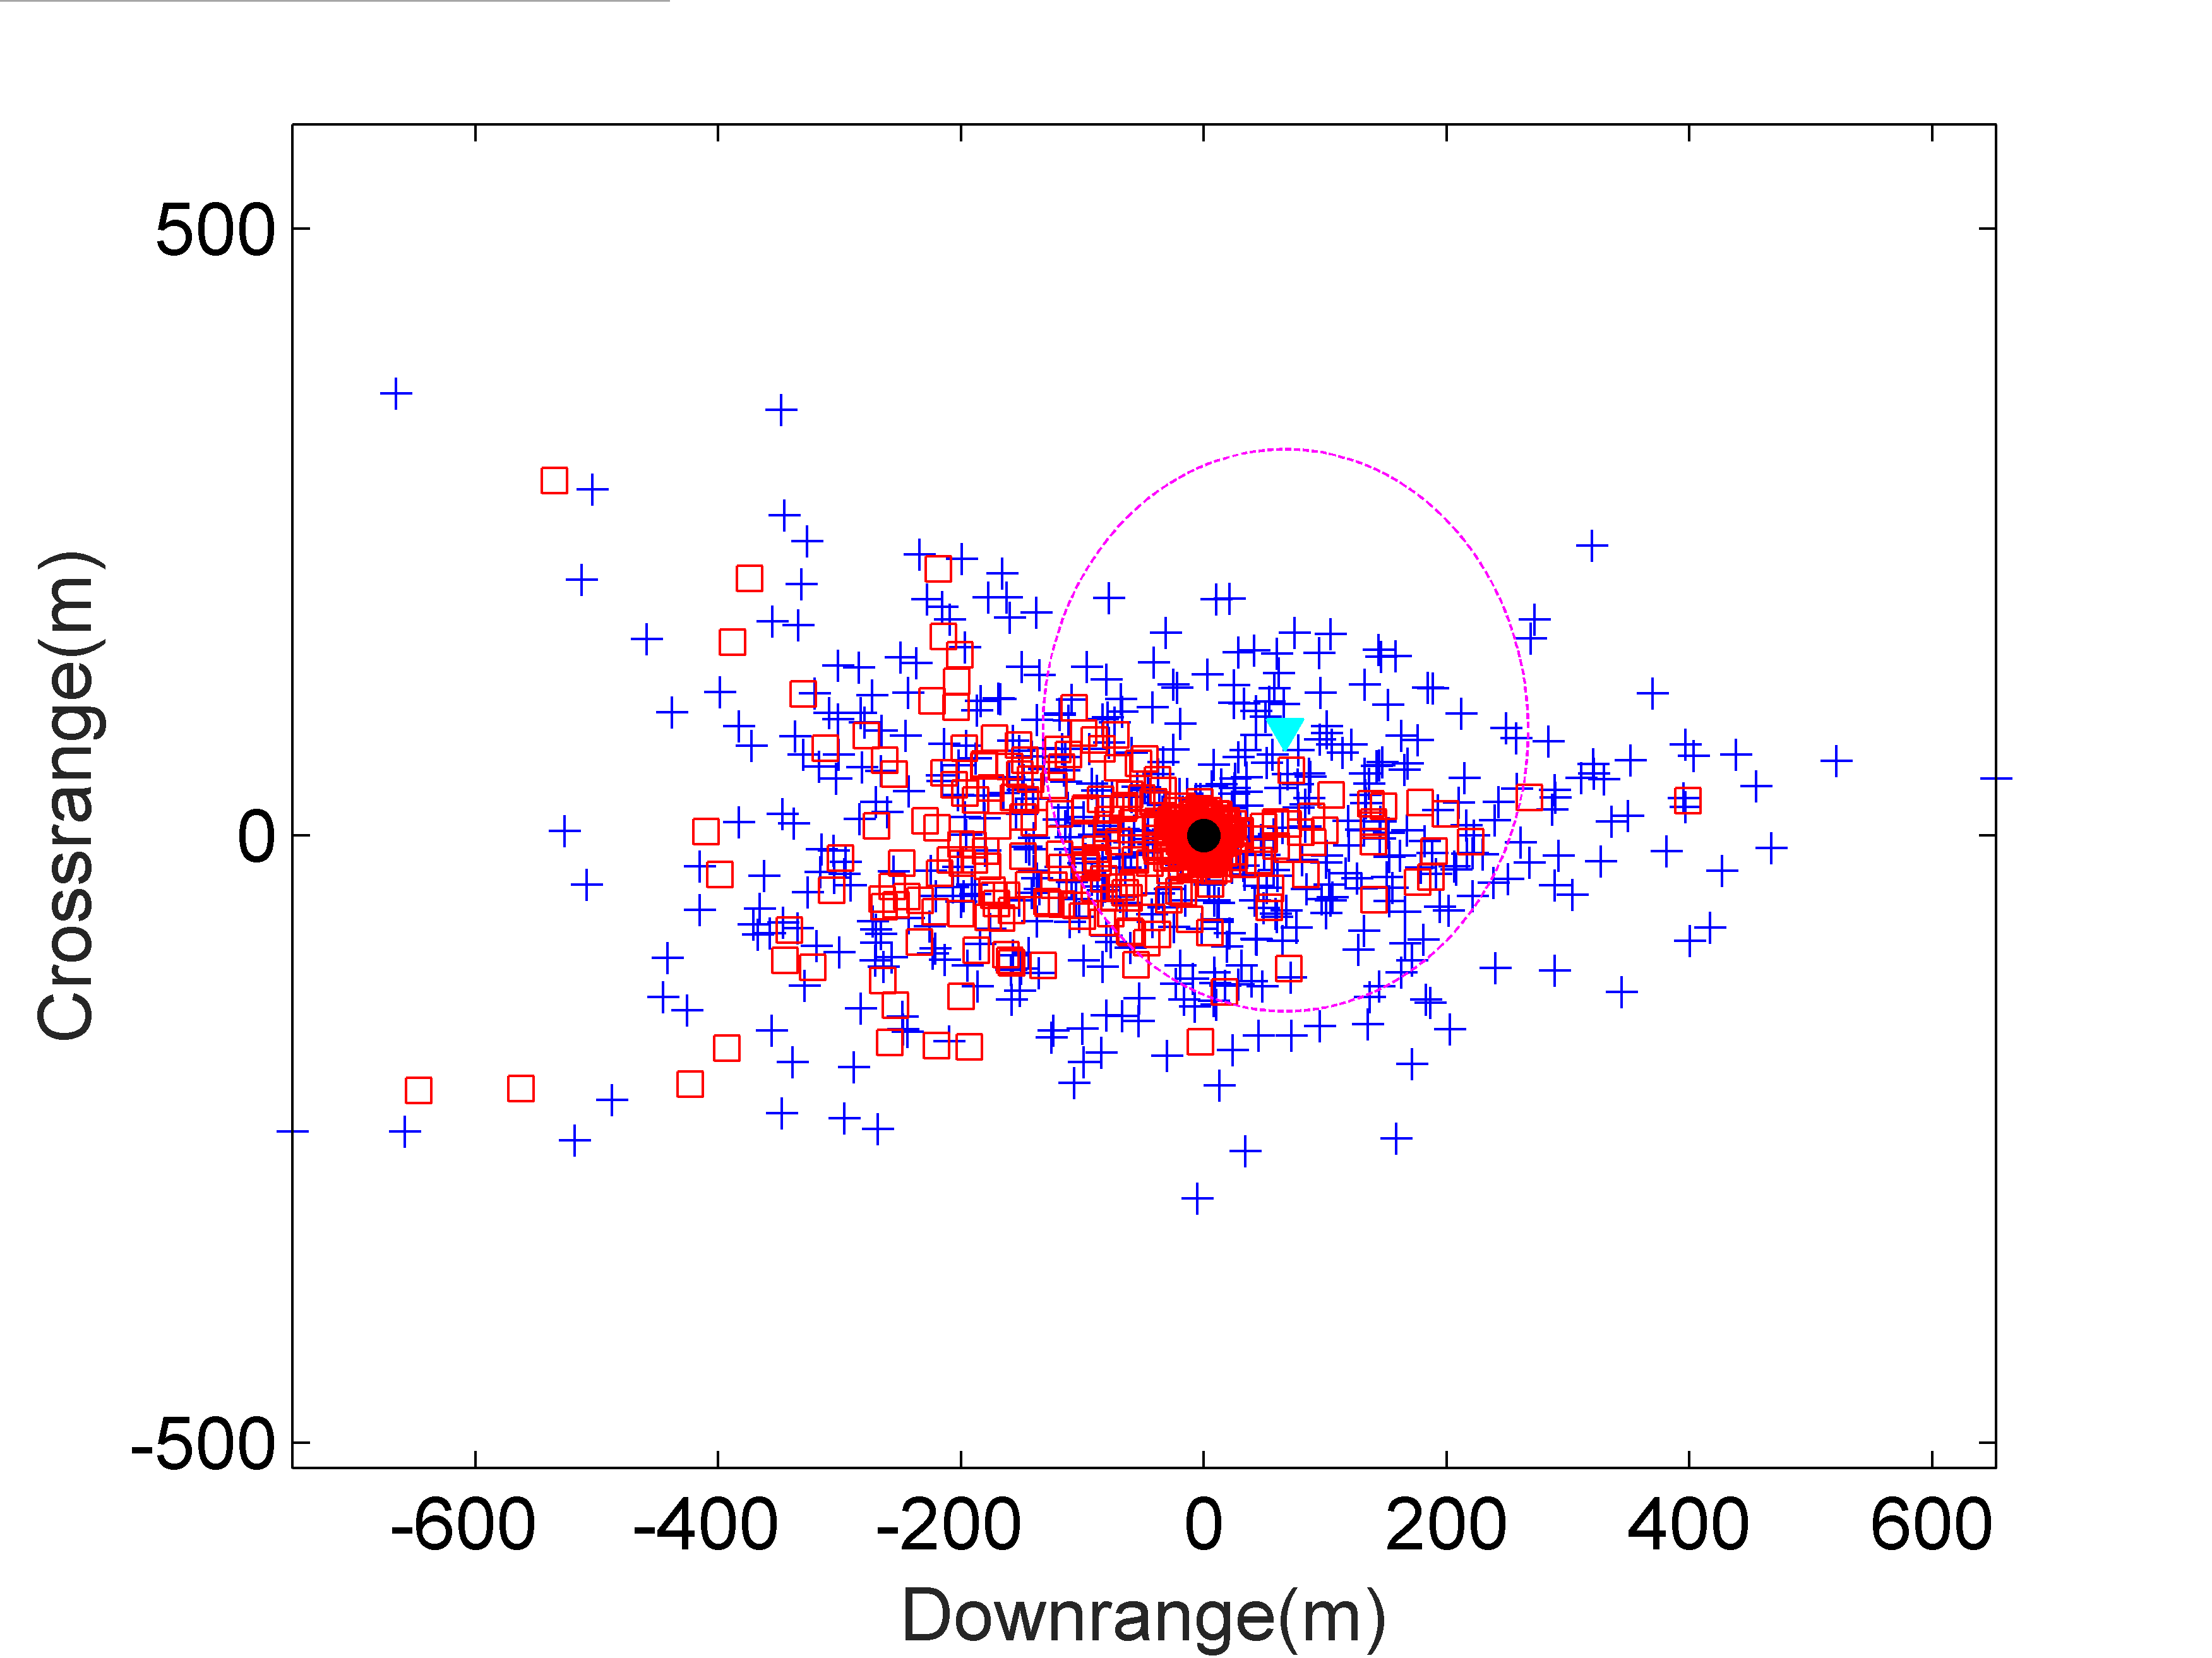

Supplement: f1 [file 4709501.f1.zip › MonteCarlo simulation results/Fig.15b/Fig. 15b.png]

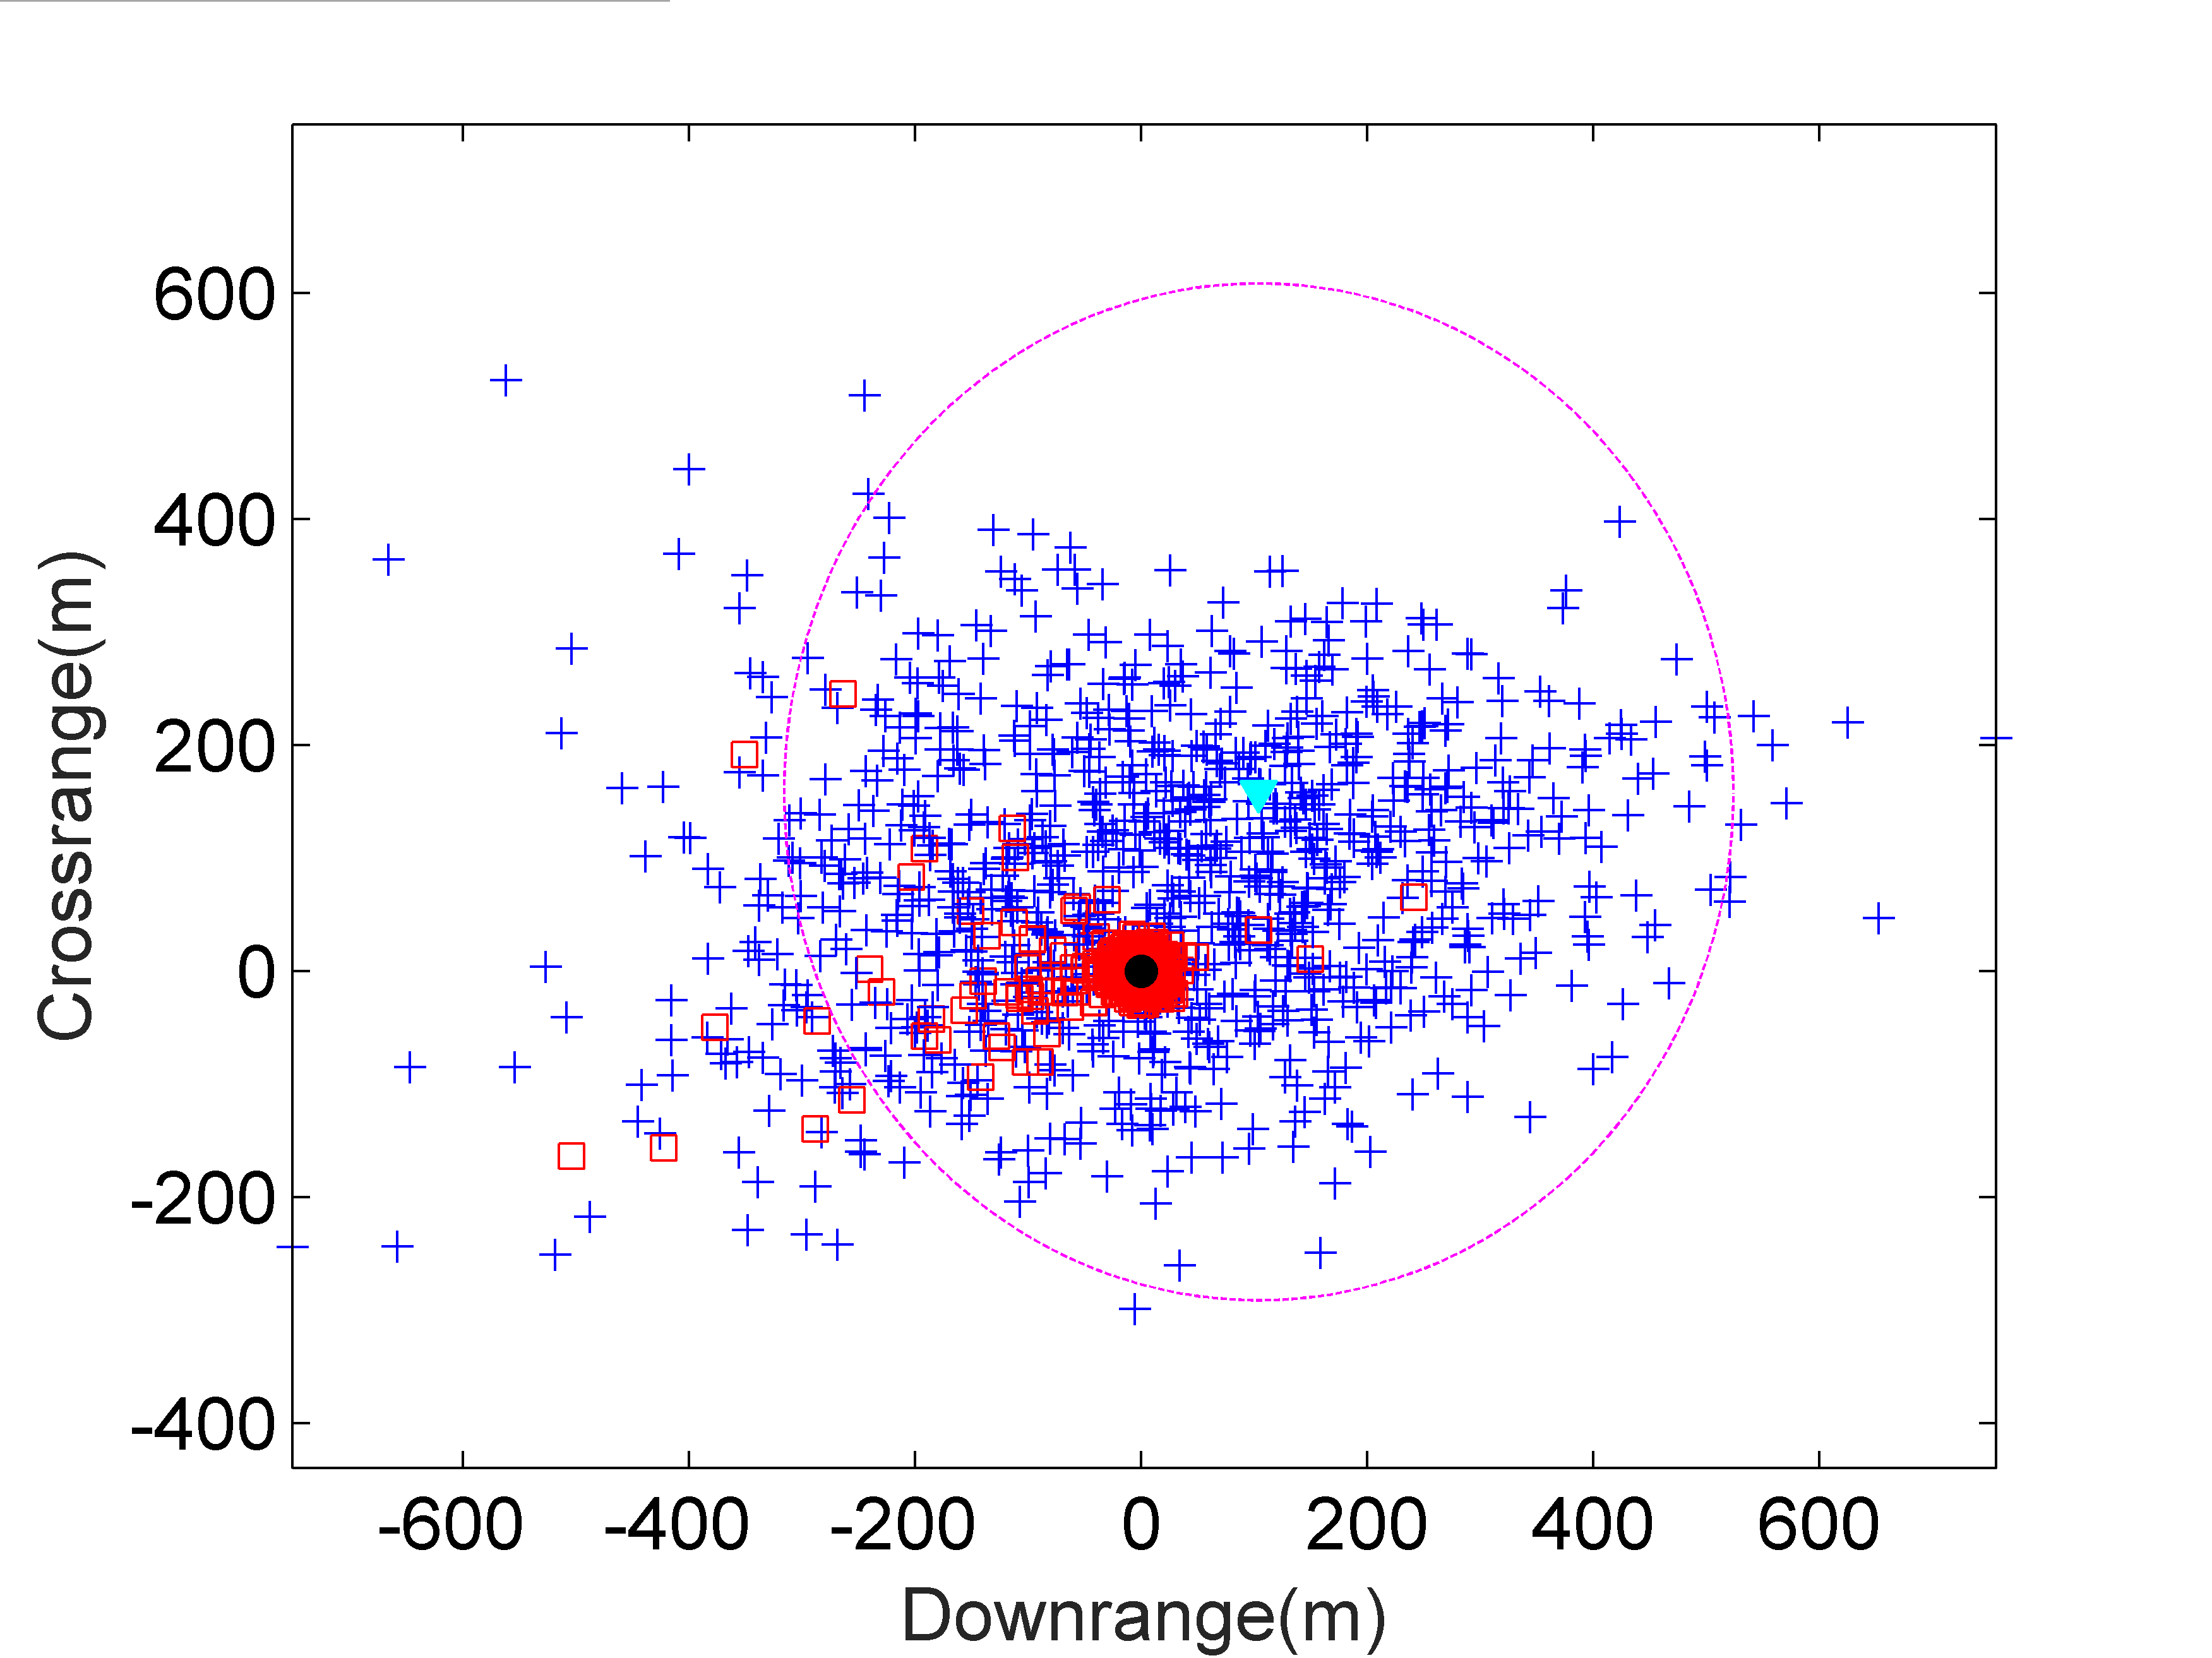

Supplement: f1 [file 4709501.f1.zip › MonteCarlo simulation results/Fig.16a/Fig.16a.png]

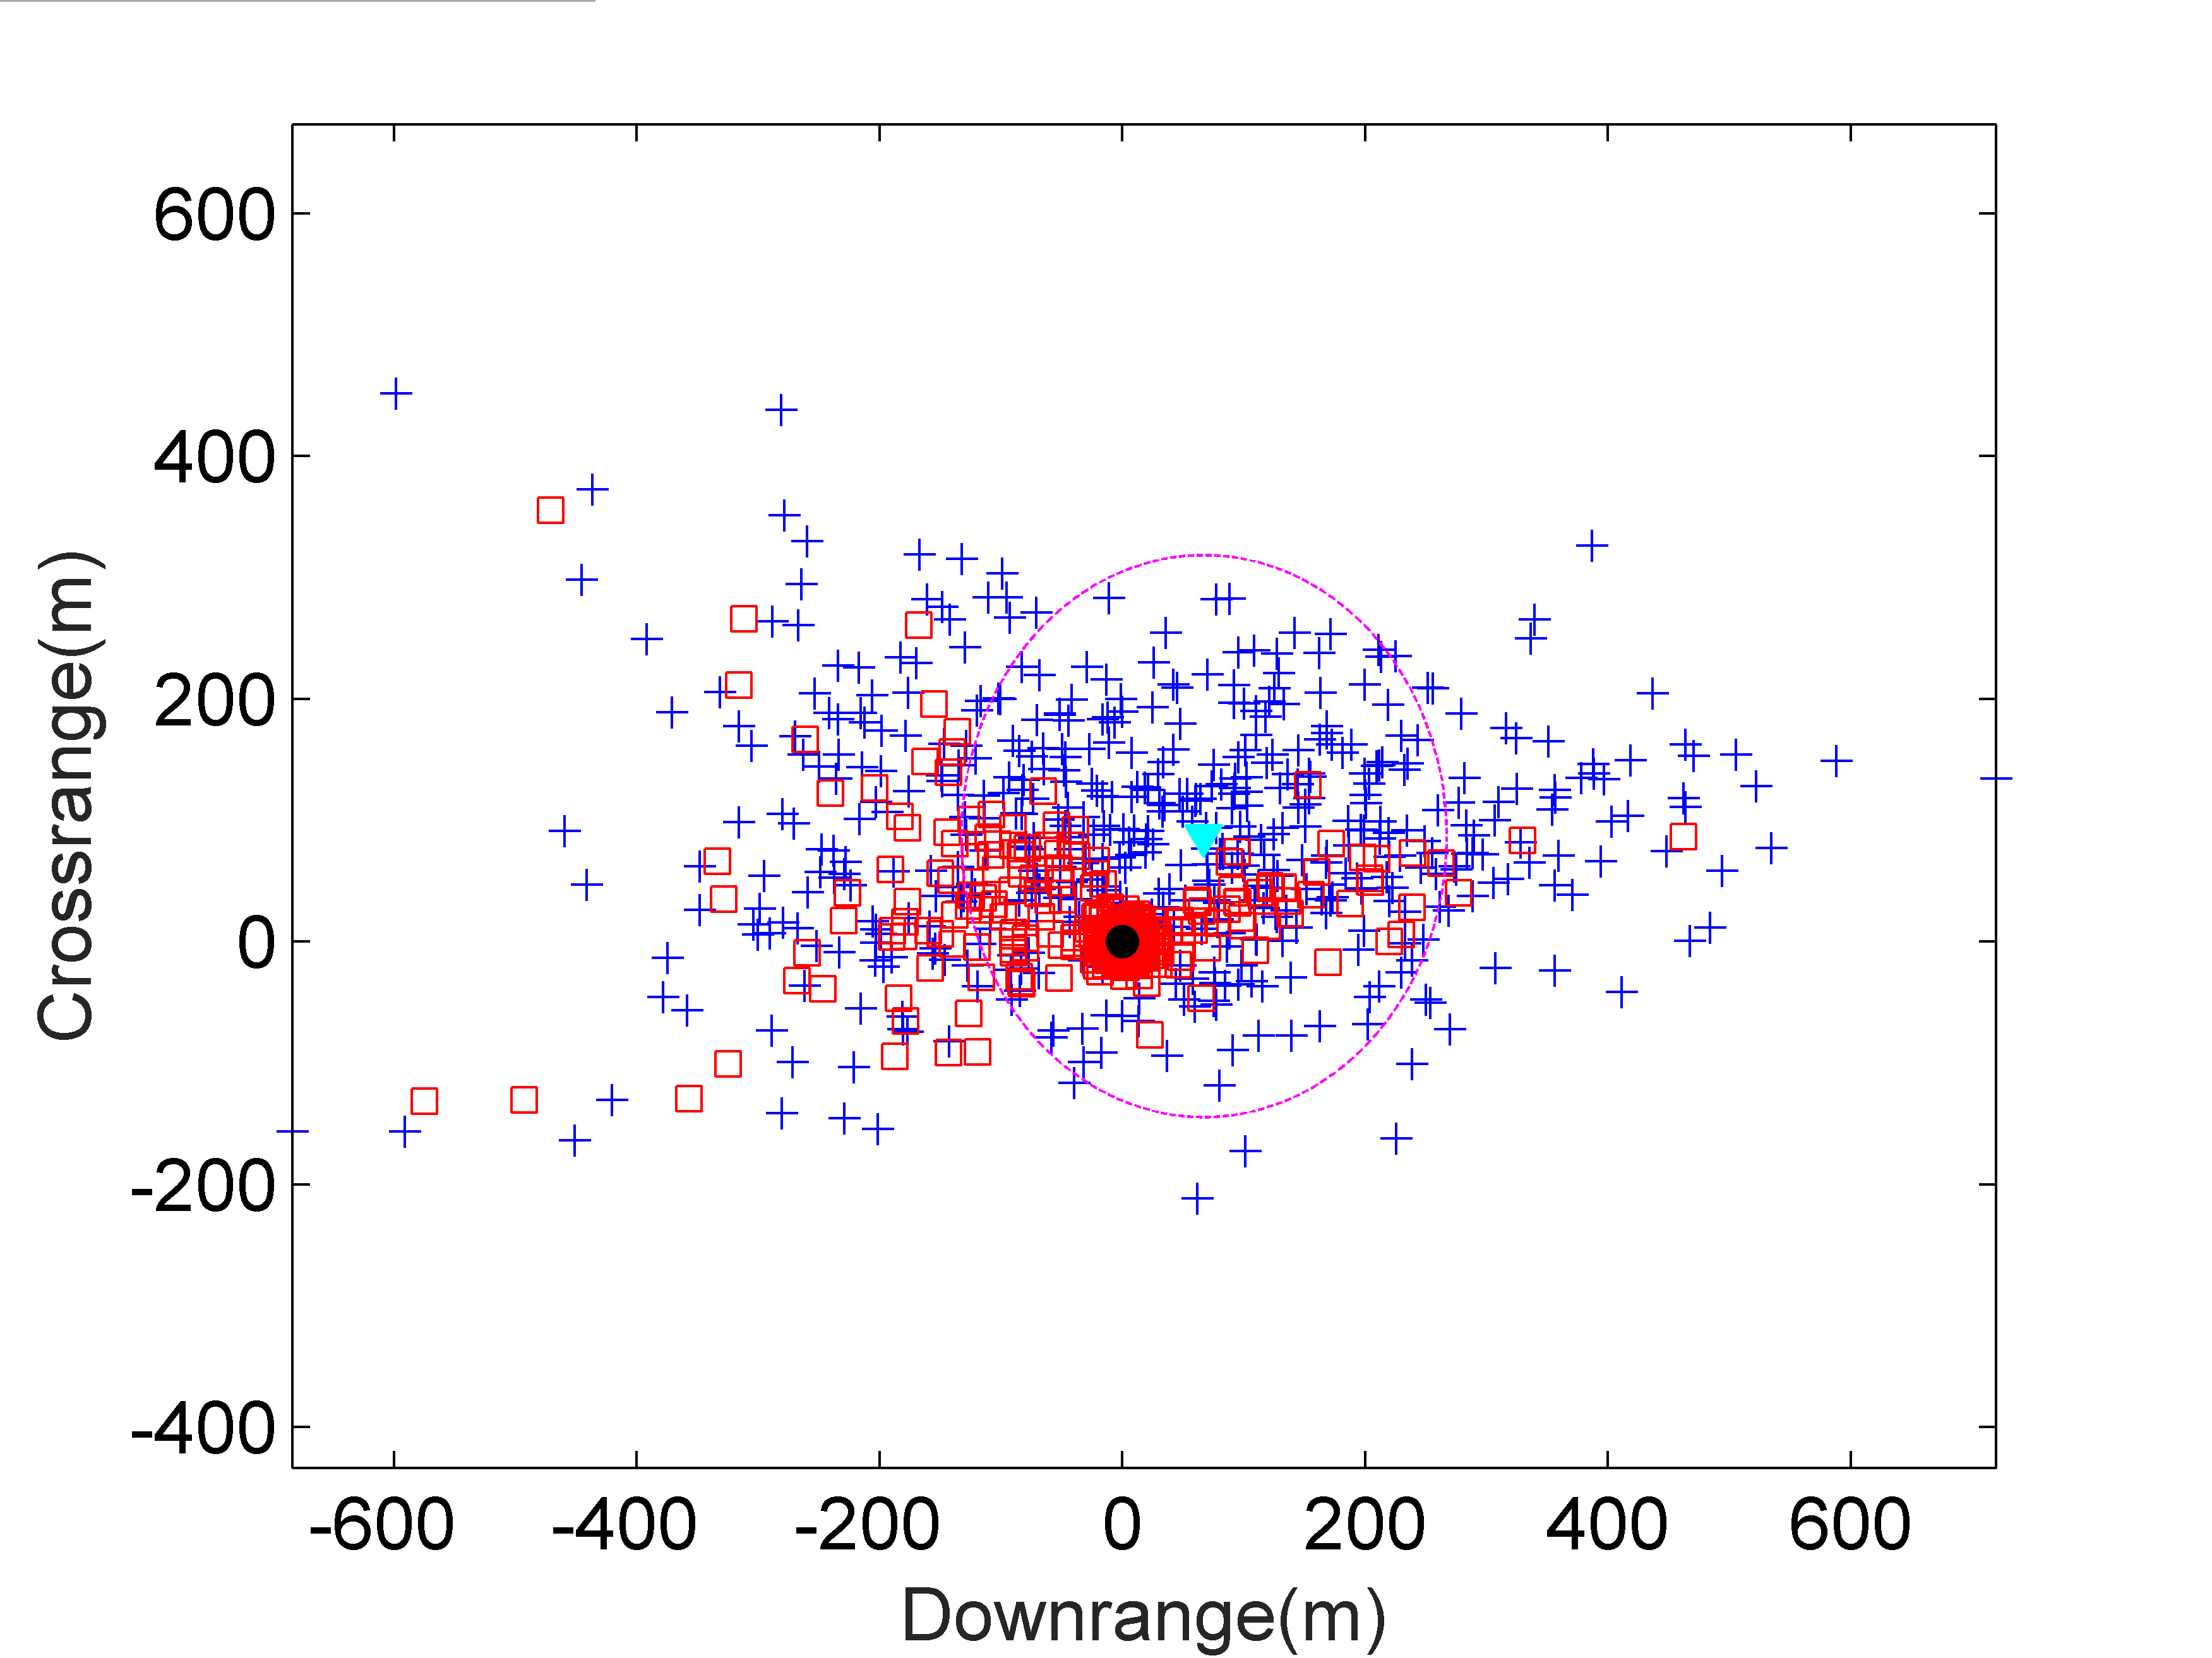

Supplement: f1 [file 4709501.f1.zip › MonteCarlo simulation results/Fig.16b/Fig.16b.png]

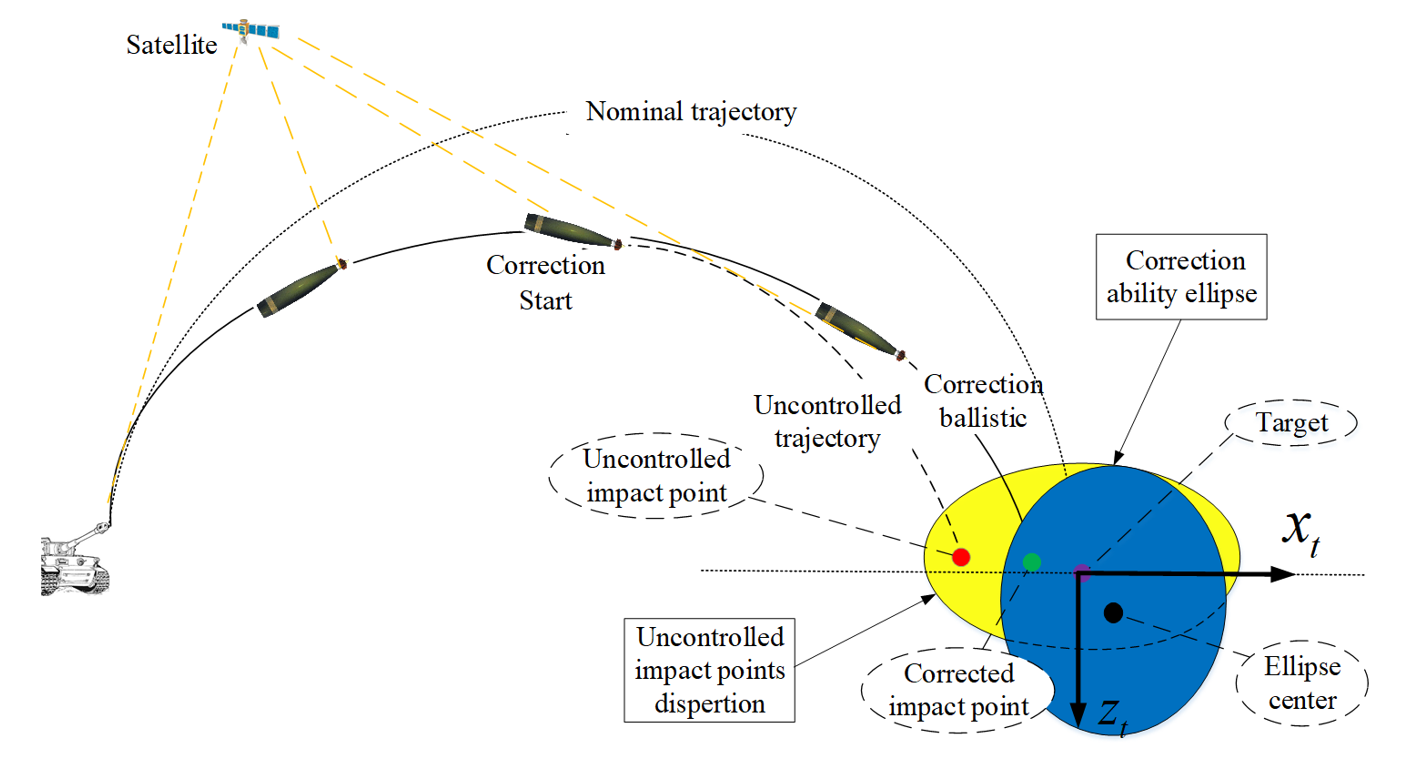

Supplement: f1 [file 4709501.f1.zip › Figures/fig10.png]

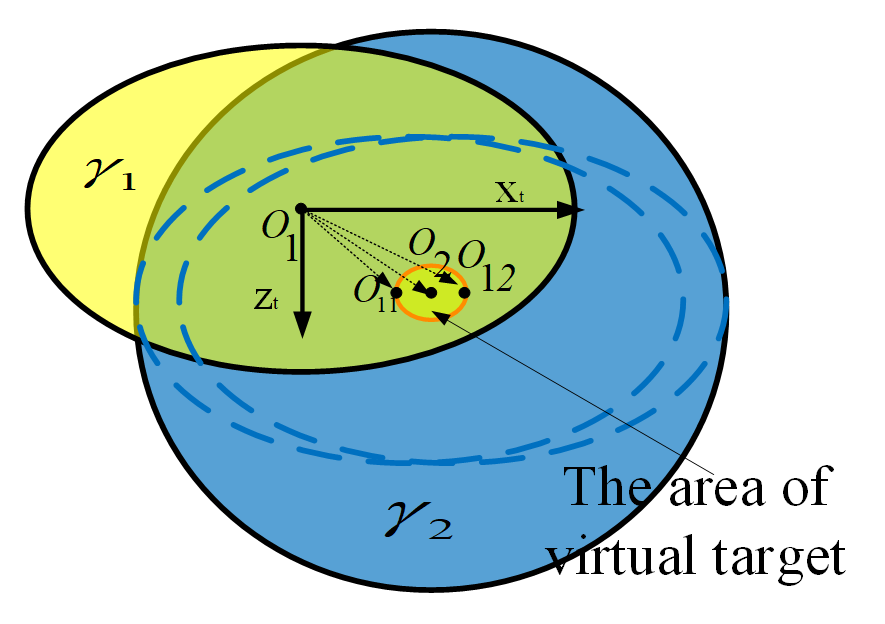

Supplement: f1 [file 4709501.f1.zip › Figures/fig11.png]

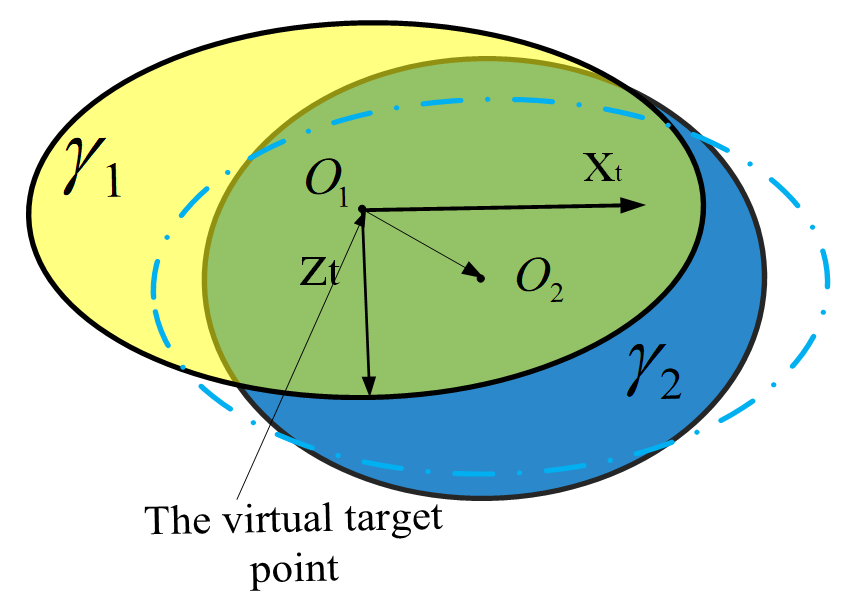

Supplement: f1 [file 4709501.f1.zip › Figures/fig12.png]

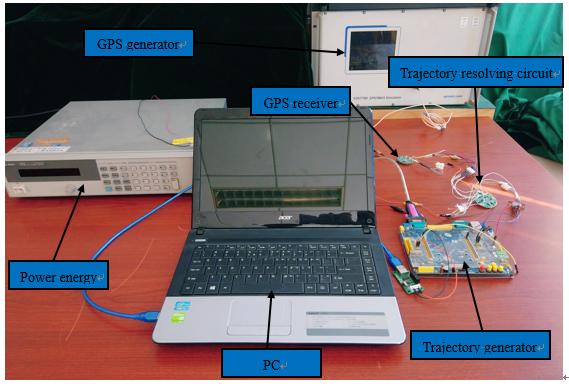

Supplement: f1 [file 4709501.f1.zip › Figures/fig13.png]

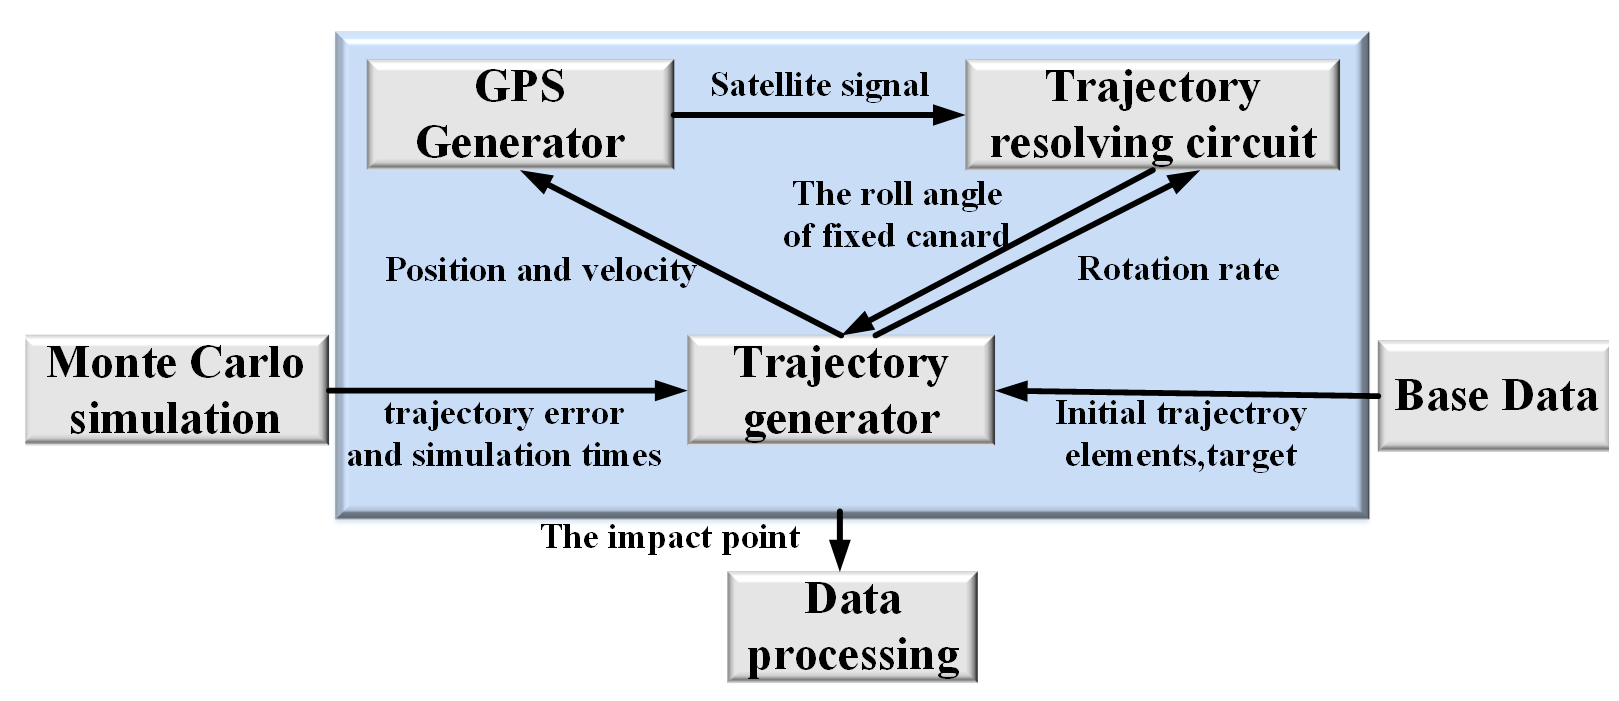

Supplement: f1 [file 4709501.f1.zip › Figures/fig14.png]

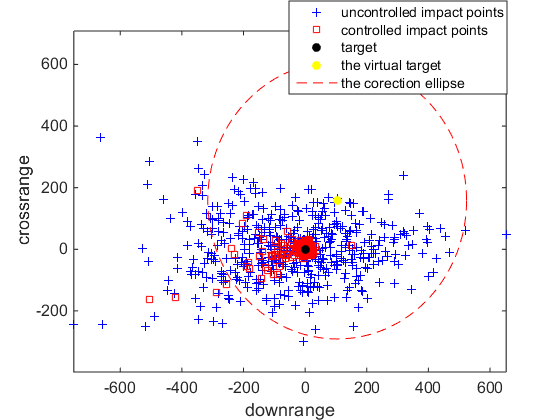

Supplement: f1 [file 4709501.f1.zip › Figures/fig15a.png]

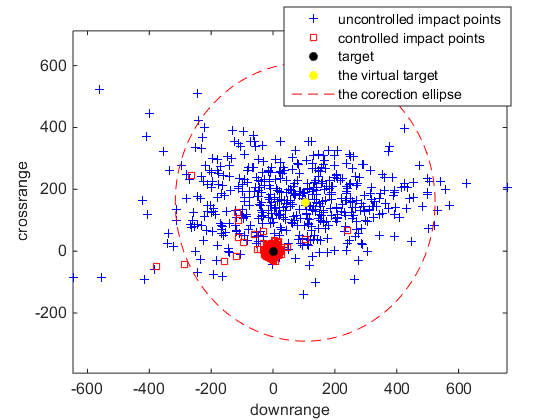

Supplement: f1 [file 4709501.f1.zip › Figures/fig15b.png]

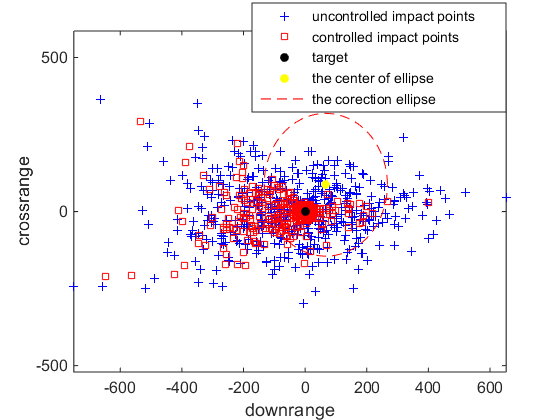

Supplement: f1 [file 4709501.f1.zip › Figures/fig16a.png]

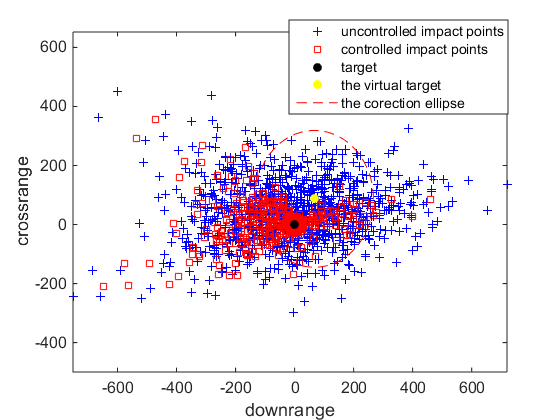

Supplement: f1 [file 4709501.f1.zip › Figures/fig16b.png]

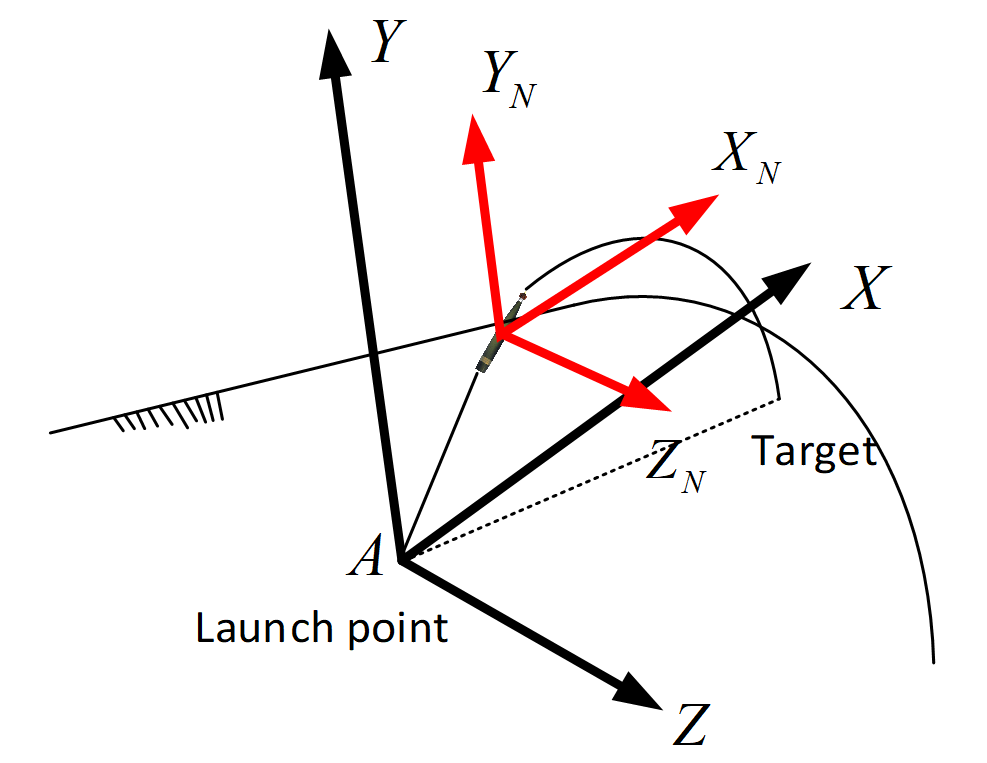

Supplement: f1 [file 4709501.f1.zip › Figures/fig1a.png]

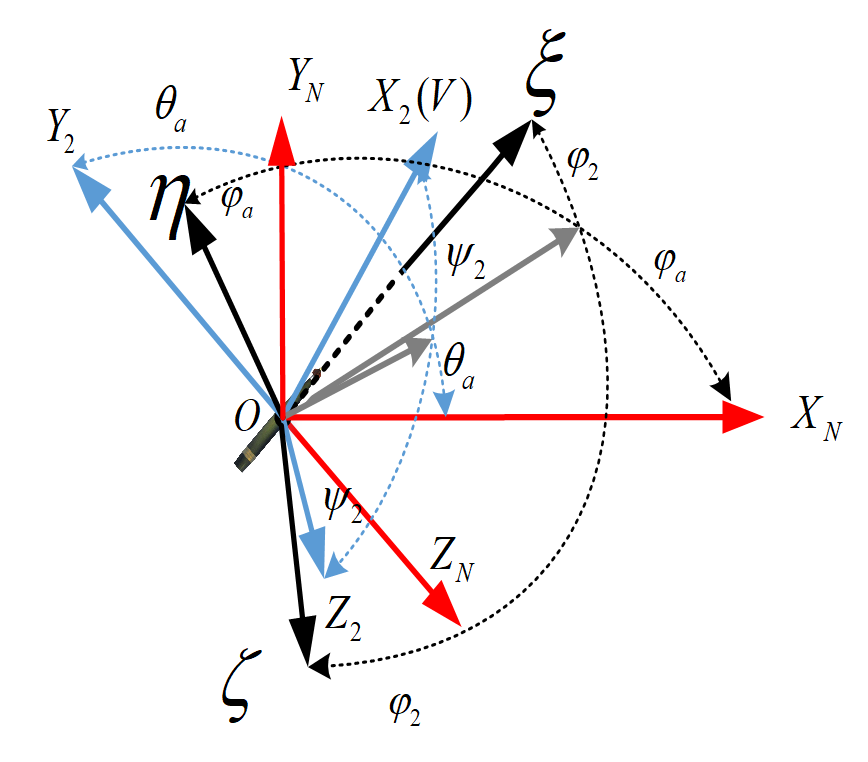

Supplement: f1 [file 4709501.f1.zip › Figures/fig1b.png]

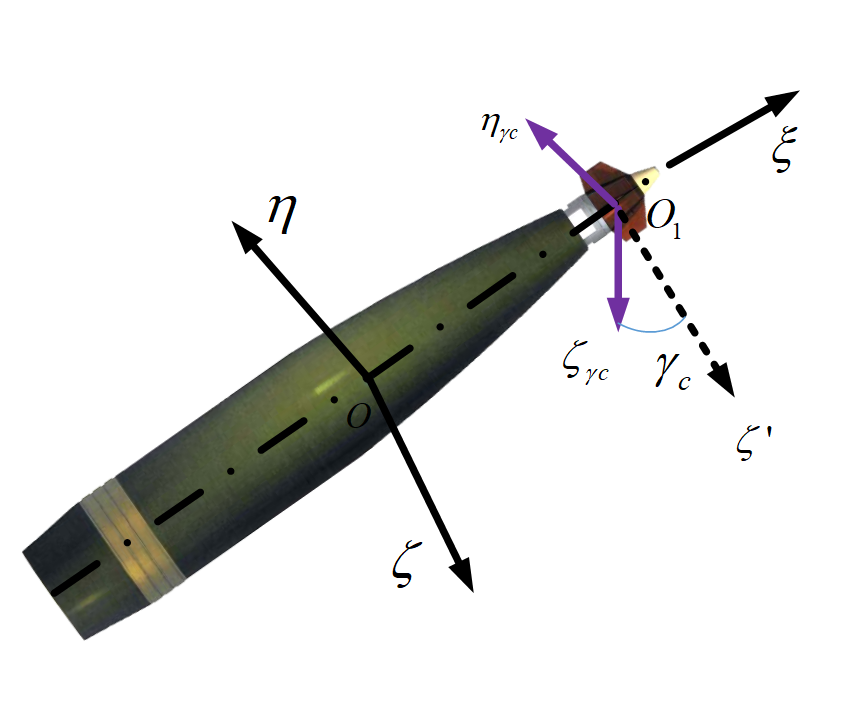

Supplement: f1 [file 4709501.f1.zip › Figures/fig1c.png]

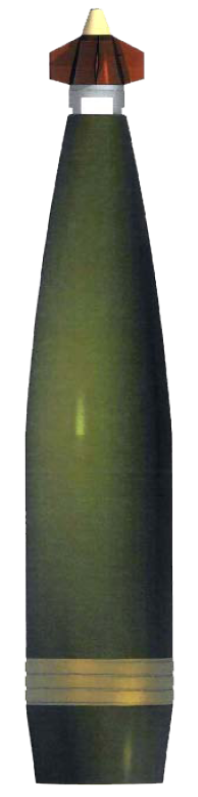

Supplement: f1 [file 4709501.f1.zip › Figures/fig2a.png]

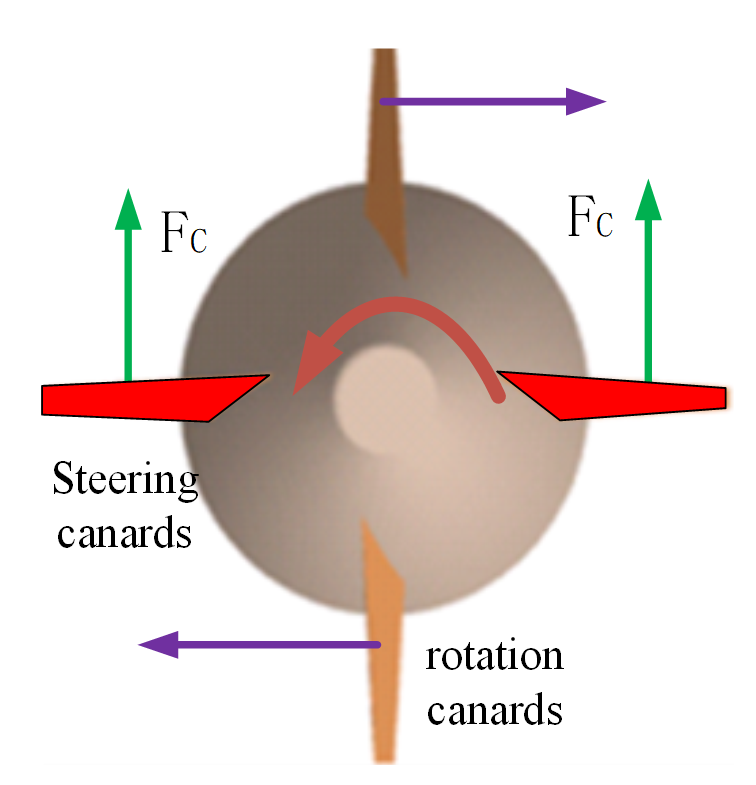

Supplement: f1 [file 4709501.f1.zip › Figures/fig2b.png]

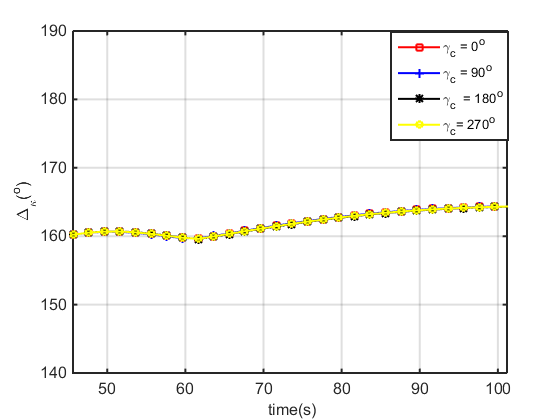

Supplement: f1 [file 4709501.f1.zip › Figures/fig3.png]

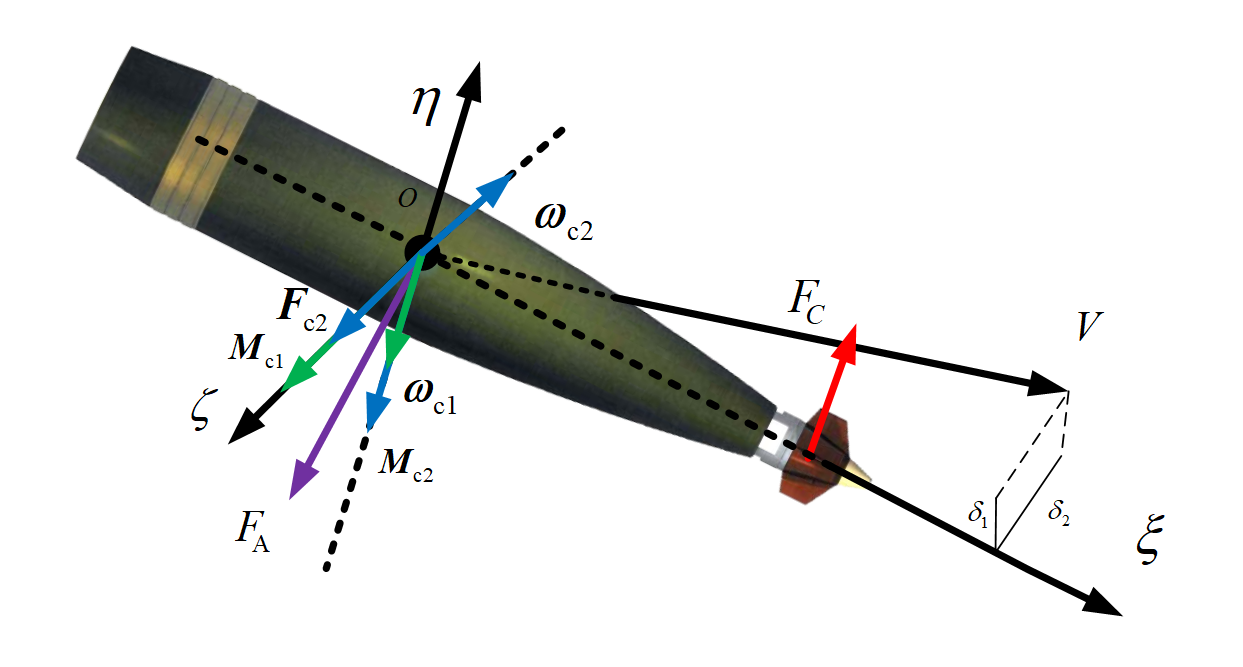

Supplement: f1 [file 4709501.f1.zip › Figures/fig4.png]

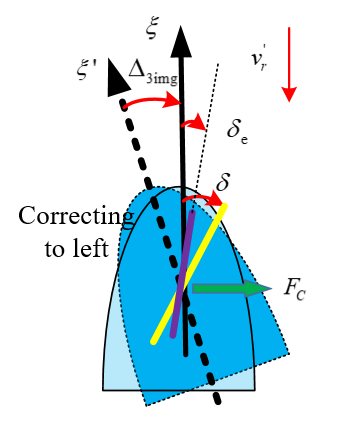

Supplement: f1 [file 4709501.f1.zip › Figures/fig5a.png]

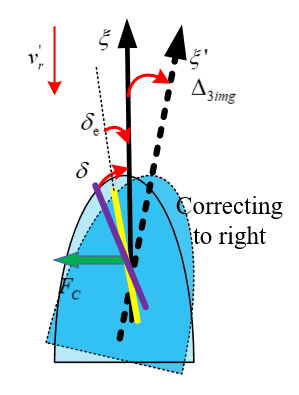

Supplement: f1 [file 4709501.f1.zip › Figures/fig5b.png]

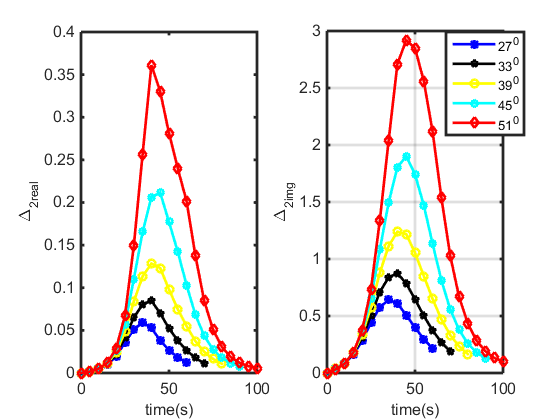

Supplement: f1 [file 4709501.f1.zip › Figures/fig6.png]

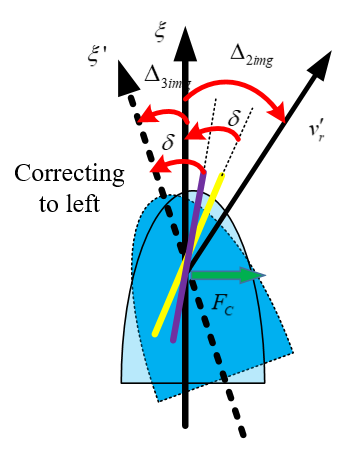

Supplement: f1 [file 4709501.f1.zip › Figures/fig7a.png]

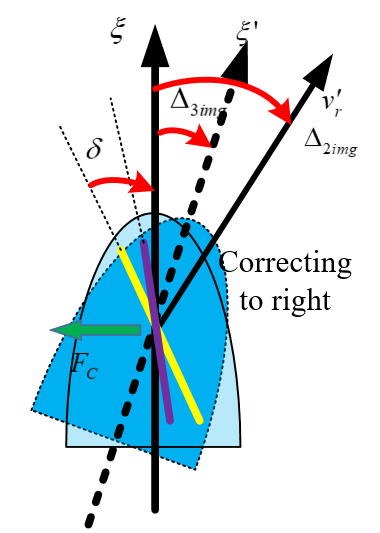

Supplement: f1 [file 4709501.f1.zip › Figures/fig7b.png]

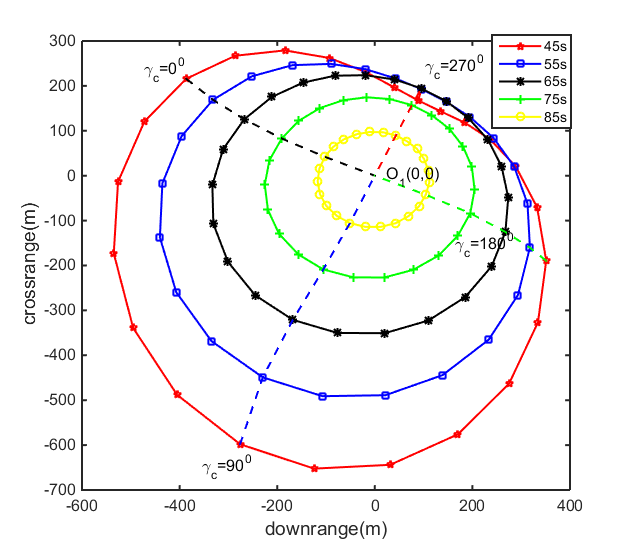

Supplement: f1 [file 4709501.f1.zip › Figures/fig8.png]

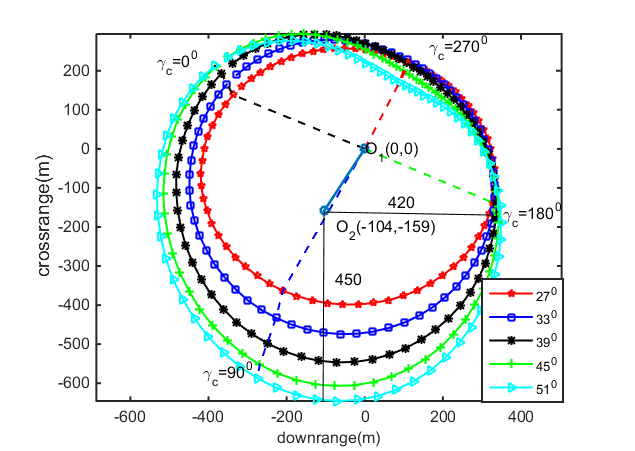

Supplement: f1 [file 4709501.f1.zip › Figures/fig9.png]
